# Supplementary material for: Deoxygenation dynamics on the western Nile deep-sea fan during sapropel S1 from seasonal to millennial timescales
Source: Copernicus journal article supplement (doi:10.5194/cp-17-1025-2021), 2021-05-12

*Supplement of*  
**“Deoxygenation dynamics above the western Nile deep-sea fan during sapropel S1 at seasonal to millennial time-scales”**

Cécile L. Blanchet et al.

Correspondence to: Cécile L. Blanchet (blanchet@gfz-potsdam.de)

**Calculations of  $\delta^{18}\text{O}$  of calcite formed in equilibrium with seawater:**

|                                                                   |                                                                           |                                      |
|-------------------------------------------------------------------|---------------------------------------------------------------------------|--------------------------------------|
| <b><i>Present seawater temperature</i></b>                        | Profiles from MedAtlas & data output from Ocean Data View                 | (MEDAR Group, 2002; Schlitzer, 2018) |
| Surface                                                           | Mean in summer: 23°C                                                      |                                      |
| 500-700 m                                                         | Mean all seasons: 13.9°C                                                  |                                      |
| <b><i>Sea-surface temperature for S1</i></b>                      | Median from Alkenone SST (core P33): 21°C                                 | (Blanchet et al., 2014)              |
| <b><i>Present seawater <math>\delta^{18}\text{O}</math></i></b>   |                                                                           | (Gat et al., 1996)                   |
| Surface                                                           | Profiles #9, 10, 13, 14 - Mean: 1.75 ‰                                    |                                      |
| 500-700 m                                                         | Profiles #9, 10, 13, 14 - Mean: 1.5 ‰                                     |                                      |
| <b><i>Sea-surface <math>\delta^{18}\text{O}</math> for S1</i></b> | Median of estimated $\delta^{18}\text{O}_{\text{sw}}$ (core P33): -0.08 ‰ | (Blanchet et al., 2014)              |

The equations used for calculating the equilibrium  $\delta^{18}\text{O}$  of inorganic calcite and biogenic carbonates shown in Fig. 5 and given in Table S4 were adopted from Bemis et al. (1998), Kim and O’Neil (1997) and Cornuault et al. (2018).

## S1. Sedimentary patterns on the western Nile deep-sea fan

**Supplementary Figure 1.** Age models and depth-to-age transformations for cores on the western Nile deep-sea fan. Cores MD27PT and MD04-2627: sedimentation rates (step curves), dating (diamonds) and Ti/Ca profiles (continuous lines) from Ménot et al. (2020) and Revel et al. (2015). Cores P33, P73 and P99: half-core surface images (for core P99, realised after sampling with empty parts shown as crosses), section number (roman numbers), schematic lithologic log (white: bioturbated, dashed: faint laminations, hatched: laminations), linear sedimentation rates (cm/ka, step curves), tie-points and age-depth relationship as computed by the Bacon software (V2.3, Blaauw and Christen, 2011), with age uncertainty envelope as dashed lines (blue violin distribution dots: radiocarbon ages, orange violin distribution dots: tie points determined by aligning Ti/Ca ratios T1-T6), Log(Ti/Ca) ratios from XRF scanning with tie-points T1 to T6 determined on each record and used to improve the age models for cores P73 and P99. See text and table 2 for more details.

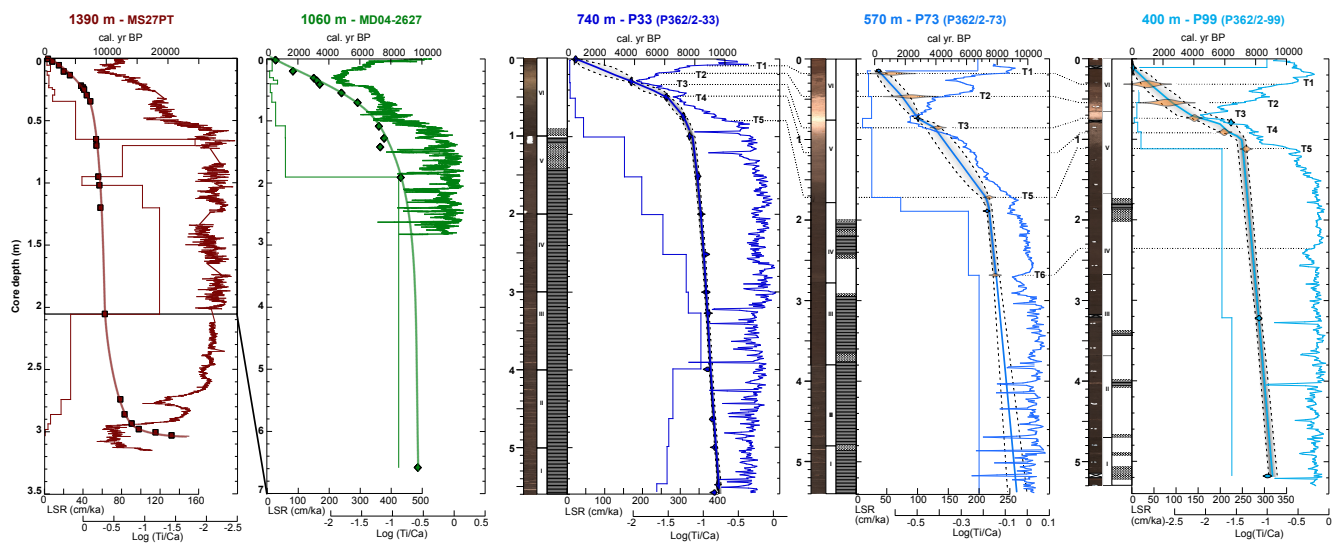

## S2. Identification of biomarkers on a gas chromatograph

**Supplementary Figure 2.** Gas chromatograms from the apolar fraction of sedimentary lipids. A: Sample collected at 484 cm in the laminated interval (sapropel S1) that shows a high concentration in long-chain odd n-alkanes (n-C<sub>25</sub>-n-C<sub>35</sub>), tracers of terrestrial organic matter. B: Close up from A that shows the presence of triterpenoids (T) and lycopane (L) (see text for details). C: Sample collected at 15 cm in non-laminated sediments, which has a lower content in n-alkanes. D: Close-up from C, which also shows lower concentrations in triterpenoids and lycopane. In A and C: the n-C<sub>22</sub> anti-iso is the internal standard used (in both cases 10 µl injected).

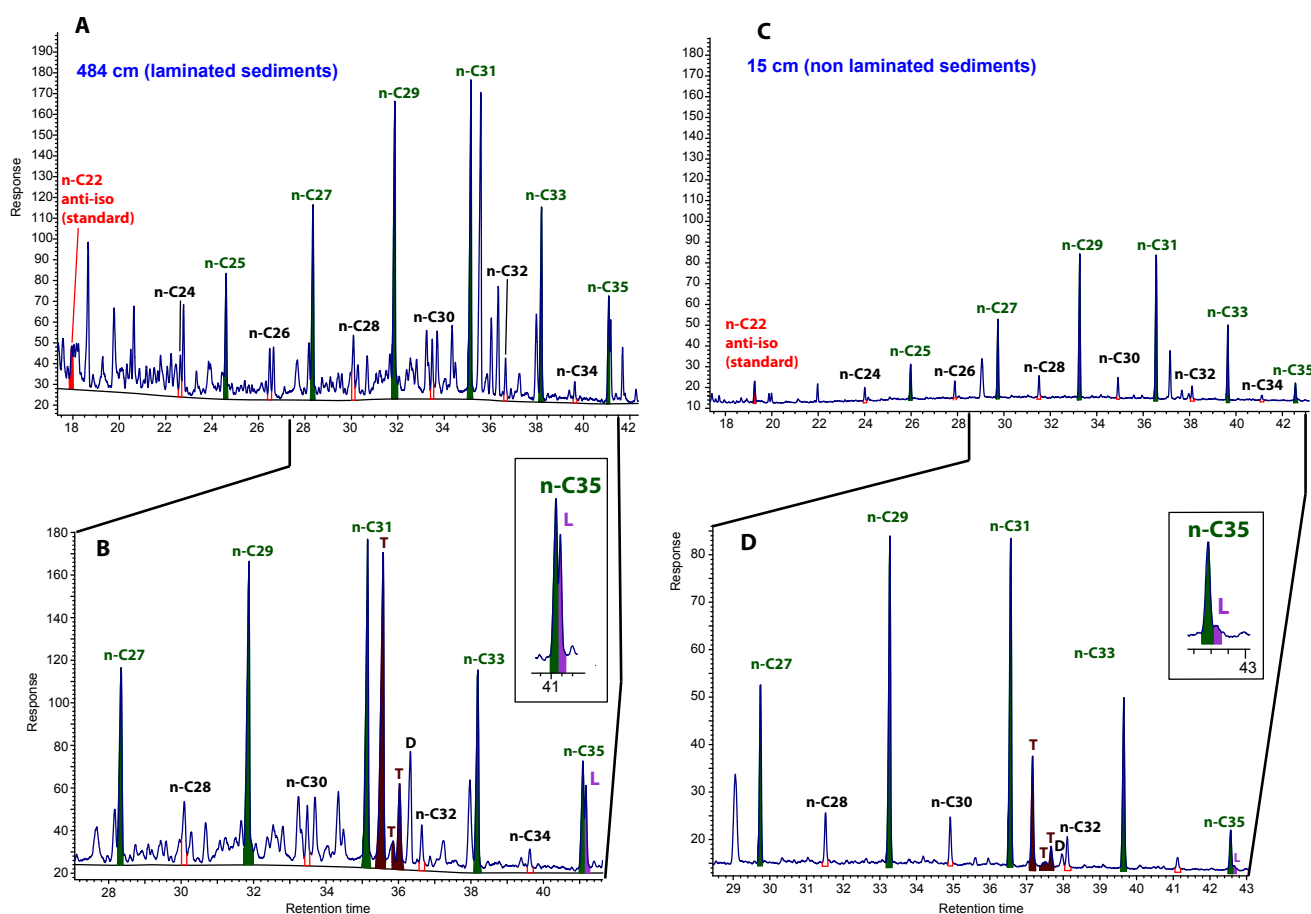

### S3. Biomarker records for cores P33 and P99

**Supplementary Figure 3.** Marine and terrestrial biomarker records from cores P99 (a, light blue) and P33 (b, dark blue). From top to bottom: MAR of C37-alkenones, crenarchaeol, long -chain odd n-alkanes, triterpenoids, branched GDGTs and lamination pattern.

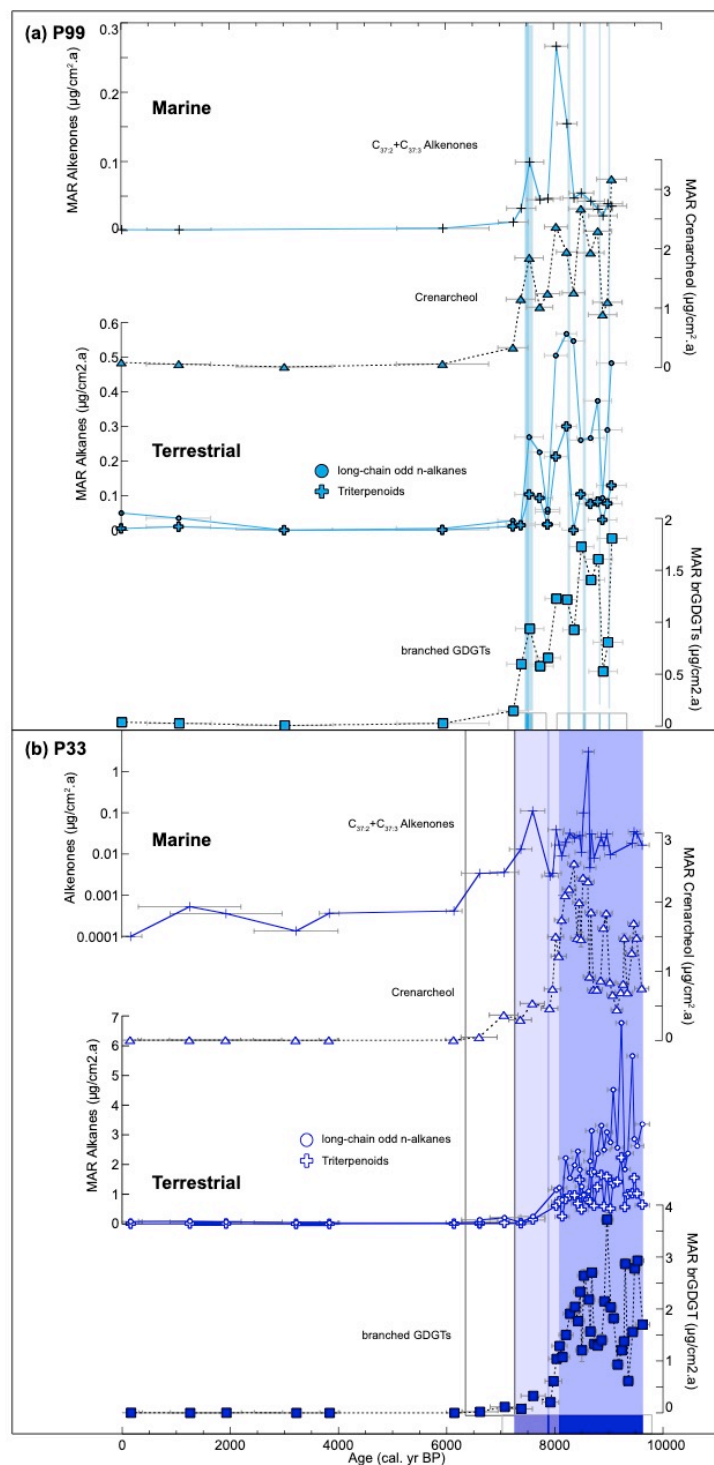

**S4. Lamination patterns in cores from the Nile DSF**

**Supplementary Figure 4.** Comparison of laminations in core P33, P73 and P99 showing the presence of LL2 in all cores. From right to left for each core: Location of thin section on the lithologic logs (red box, legend similar as in Supplementary Figure 1); Core picture in natural light with sampling slab (above) and scanned 10 cm-long thin sections in cross-polarised light (below); Microfacies interpretations, with colour codes similar as in the main text: red: LL1, grey: DL1, yellow: LL2 and black: DL2. The different texture in thin sections of cores P73 and P99 is due to air bubbles, which got trapped in the resin during the process.

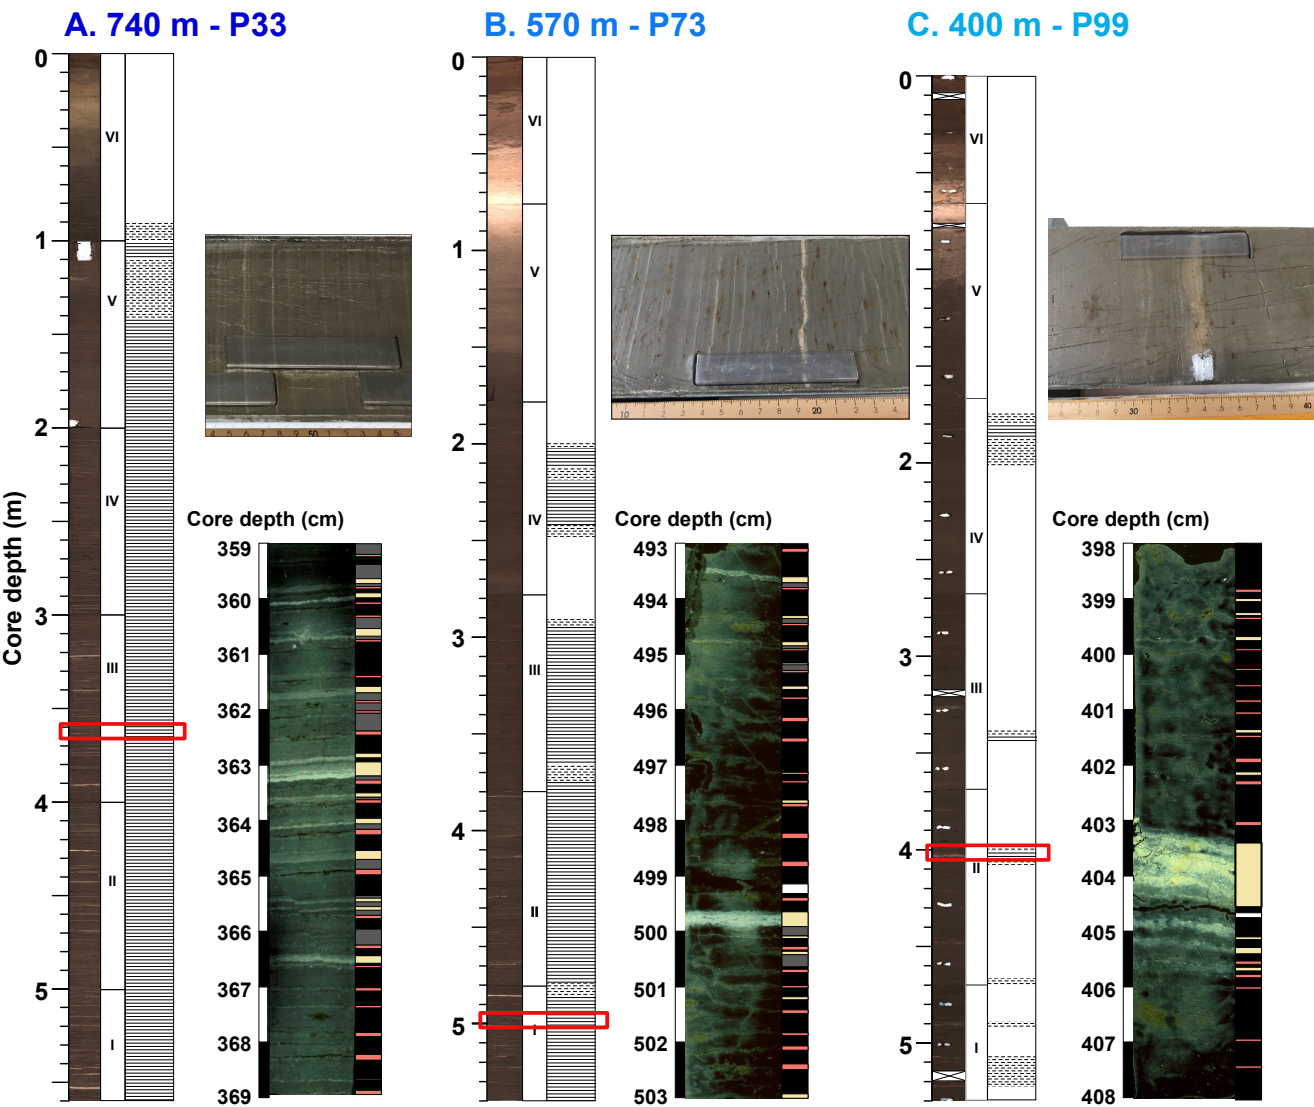

## S5. Additional microscopic observations

**Supplementary Figure S5.** A: partly-polarised (up) and directly (down) transmitted light microscope images of a foraminifera filled with iron sulfides (deposited at the bottom of the shell), with layers of organic matter. B: Backscatter SEM image of a grain of iron sulphide, probably pyrite.

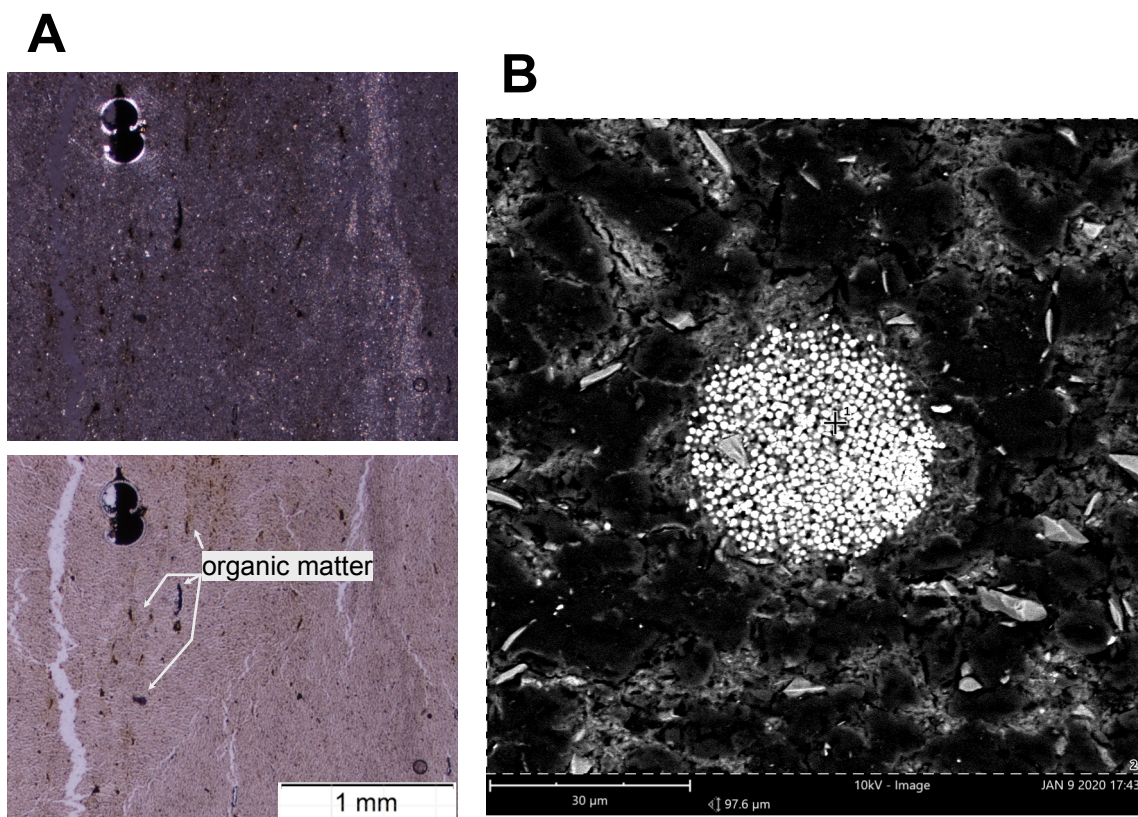

Supplement: Supplementary file 1 [file cp-17-1025-2021-supplement.zip]
