# Supplementary material for: Deoxygenation dynamics on the western Nile deep-sea fan during sapropel S1 from seasonal to millennial timescales
Source: Copernicus journal article supplement (doi:10.5194/cp-17-1025-2021), 2021-05-12
Supplement: Supplementary file 1 [file Suppl_Table_S1.xls]

## Sheet: Read me
Blanchet, Cécile L; Tjallingii, Rik; Schleicher, Anja; Schouten, Stefan; Frank, Martin; Brauer, Achim (2020): XRF elemental contents, oxygen and carbon isotopes and biomarkers of sediment core POS362-2_33.
In supplement of
Deoxygenation dynamics on the western Nile deep-sea fan during sapropel S1 from seasonal to millenial time-scales
Blanchet et al.

## Sheet: XRF-Tab S1
Core depth (cm	Age (yr BP)	error (2s)	Log(S/Cl)	Log(K/Ti)	Log(Ti/Ca)	Z-scored Log(Ti/Ca)
1	161	210	-1.26011	-0.185402	-0.807072	-0.554919
2	227.5	262.75	-1.24257	-0.232637	-0.691511	-0.31823
3	358	390.75	-1.28513	-0.249989	-0.521582	0.0298142
4	486	546.75	-1.25463	-0.262099	-0.514202	0.0449296
5	613.5	711.5	-1.24163	-0.225451	-0.778021	-0.495418
6	741	831.75	-1.27735	-0.248808	-0.76639	-0.471595
7	868.5	867.75	-1.27597	-0.284106	-0.361139	0.358428
8	999.5	881.25	-1.22524	-0.161487	-0.939081	-0.825297
9	1130.5	909	-1.24132	-0.095933	-1.23039	-1.42196
10	1256	948.5	-1.28407	-0.0939516	-1.19261	-1.34456
11	1381.5	980.5	-1.23641	-0.0737704	-1.25945	-1.48146
12	1514.5	979.5	-1.17336	-0.0246952	-1.33642	-1.63912
13	1654	976	-1.2078	-0.00686942	-1.35436	-1.67586
14	1792	993.5	-1.22174	0.00719762	-1.40632	-1.78228
15	1927	1036	-1.28795	-0.0174763	-1.33612	-1.63851
16	2059	1068	-1.21788	-0.000995661	-1.33926	-1.64492
17	2190	1053	-1.19525	0.0498737	-1.46113	-1.89455
18	2322.5	1030.25	-1.23637	0.121044	-1.62729	-2.23488
19	2459.5	1025.25	-1.23061	0.154289	-1.66896	-2.32022
20	2601.5	1035.5	-1.20629	0.169867	-1.6844	-2.35184
21	2734.5	1029.5	-1.21617	0.10347	-1.64198	-2.26495
22	2854	966.75	-1.29339	0.144654	-1.69118	-2.36573
23	2971.5	885	-1.22379	0.129398	-1.69936	-2.38248
24	3092.5	822.25	-1.24795	0.169833	-1.78006	-2.54776
25	3220.5	777.25	-1.2227	0.156003	-1.7665	-2.51999
26	3348	708.75	-1.24525	0.178944	-1.81298	-2.61519
27	3469	563.5	-1.19405	0.257357	-1.90959	-2.81308
28	3588.5	378.25	-1.19889	0.259645	-1.94984	-2.89552
29	3709.5	217	-1.19165	0.246063	-1.9199	-2.83418
30	3837	182	-1.27015	0.185537	-1.87912	-2.75066
31	3965.5	258	-1.18089	0.238143	-1.87998	-2.75242
32	4094.5	314	-1.17395	0.197414	-1.78857	-2.56519
33	4222	368.25	-1.20665	0.20101	-1.75701	-2.50055
34	4341	460.5	-1.22849	0.168301	-1.70329	-2.39054
35	4453	572	-1.23775	0.118021	-1.5912	-2.16096
36	4564	650	-1.24418	0.158255	-1.64558	-2.27232
37	4685.5	663	-1.20044	0.189259	-1.66968	-2.32169
38	4815.5	661.25	-1.2682	0.128732	-1.56859	-2.11464
39	4943	683	-1.20583	0.103478	-1.50595	-1.98634
40	5066	723	-1.22539	0.10637	-1.48868	-1.95097
41	5185	733.5	-1.22116	0.0992657	-1.42236	-1.81514
42	5301	672	-1.22702	0.0400339	-1.35705	-1.68138
43	5419.5	596.5	-1.26577	0.0679544	-1.34256	-1.6517
44	5544.5	553.5	-1.15907	0.0156943	-1.24513	-1.45213
45	5675.5	527.75	-1.27847	0.0255099	-1.26748	-1.49792
46	5793.5	492.75	-1.20467	0.0237944	-1.26933	-1.50171
47	5885	406	-1.19639	0.0180818	-1.30427	-1.57327
48	5965.5	286.5	-1.21097	0.0392992	-1.35564	-1.67847
49	6050	184.5	-1.24746	0.0726029	-1.42835	-1.82741
50	6141.5	147.5	-1.20749	0.0659028	-1.37244	-1.7129
51	6221	177	-1.219	0.0550122	-1.36116	-1.68979
52	6273.5	203.75	-1.18759	0.0288036	-1.32118	-1.60791
53	6314.5	218	-1.29788	0.0332732	-1.33362	-1.63338
54	6354	244.5	-1.25064	0.0346863	-1.30512	-1.575
55	6391.5	279.75	-1.27995	0.0548844	-1.33033	-1.62665
56	6430	304.5	-1.21245	0.00192227	-1.24976	-1.46161
57	6473.5	307.75	-1.2352	-0.0106138	-1.27709	-1.5176
58	6522	307	-1.26269	0.00228267	-1.26686	-1.49664
59	6570.5	315	-1.27322	0.00397894	-1.27475	-1.51281
60	6616	332.75	-1.19318	0.00061988	-1.19754	-1.35467
61	6659.5	347.25	-1.22265	-0.0382253	-1.13444	-1.22543
62	6704	341.5	-1.2502	-0.02796	-1.11645	-1.18858
63	6751	329.75	-1.17775	-0.0282884	-1.12591	-1.20796
64	6800	326.5	-1.14414	-0.0801086	-1.10499	-1.16512
65	6848.5	331.5	-1.12654	-0.0477713	-1.05018	-1.05284
66	6893	332.5	-1.1493	-0.0887004	-1.00366	-0.957565
67	6935	314.75	-1.09773	-0.053218	-1.01456	-0.979893
68	6978.5	290.25	-1.05736	-0.0709996	-0.90784	-0.76131
69	7024	273.5	-1.09353	-0.0760821	-0.954014	-0.855882
70	7071	266	-1.08964	-0.0681601	-0.990319	-0.930241
71	7114.5	257	-0.996836	-0.0940843	-0.847815	-0.638368
72	7151	231.5	-1.00835	-0.0613273	-0.833138	-0.608308
73	7185.5	200.25	-0.961017	-0.0855415	-0.820421	-0.58226
74	7221	181.25	-0.9629	-0.0888645	-0.818326	-0.57797
75	7258	176	-0.969351	-0.0649933	-0.881048	-0.706436
76	7291.5	179.25	-0.98084	-0.0996848	-0.84178	-0.626007
77	7317	182	-1.00453	-0.096281	-0.69093	-0.317041
78	7338	184.75	-0.989772	-0.115919	-0.676813	-0.288125
79	7357.5	193.75	-1.01237	-0.109127	-0.729109	-0.395239
80	7376.5	208.5	-0.944455	-0.099733	-0.676538	-0.287562
81	7396	220	-1.00366	-0.147889	-0.538616	-0.00507488
82	7417.5	221.25	-0.933626	-0.135804	-0.434875	0.207406
83	7440	219.5	-0.939667	-0.118199	-0.49397	0.0863677
84	7462.5	220.25	-0.885401	-0.121096	-0.342004	0.397621
85	7484.5	225.75	-0.923754	-0.0926464	-0.494253	0.0857893
86	7506	230.5	-0.934758	-0.0952345	-0.483947	0.106897
87	7528.5	227.5	-0.936374	-0.117642	-0.517755	0.0376523
88	7552	222.5	-0.921077	-0.112926	-0.492499	0.0893808
89	7576	220.75	-0.908733	-0.144236	-0.354136	0.372772
90	7599.5	223.5	-0.857001	-0.119984	-0.454239	0.167744
91	7622	225.5	-0.943684	-0.130988	-0.466888	0.141836
92	7644.5	220.25	-0.871619	-0.126596	-0.471414	0.132567
93	7667.5	212	-0.886774	-0.107319	-0.477072	0.120979
94	7690.5	208.75	-0.879691	-0.0227858	-1.11913	-1.19406
95	7714	210.5	-0.881853	-0.0764885	-0.799959	-0.540351
96	7736.5	207.25	-0.881565	-0.118636	-0.507188	0.0592958
97	7757	190.25	-0.909187	-0.101821	-0.483857	0.10708
98	7778	169	-0.973693	-0.113918	-0.468677	0.138173
99	7801	154.75	-0.913691	-0.126023	-0.334526	0.412937
106	7880	155	-0.969995	-0.13382	-0.448878	0.178725
108	7892.5	153.25	-1.05023	-0.139959	-0.234701	0.617396
110	7905	153.75	-1.13851	-0.156199	-0.292059	0.499917
112	7918	153.5	-1.13896	-0.102138	-0.36364	0.353306
114	7930	153	-1.25426	-0.113031	-0.31083	0.46147
116	7943	154	-1.11425	-0.130151	-0.244999	0.596304
118	7955	152.5	-1.25235	-0.127658	-0.302715	0.478092
120	7967.5	153.25	-1.24131	-0.109091	-0.716268	-0.368938
122	7980	151.75	-1.22273	-0.129016	-0.582156	-0.0942516
124	7992.5	149.5	-1.19378	-0.0707089	-0.478755	0.117531
126	8005	149	-1.13287	-0.11178	-0.4383	0.20039
128	8017	146.5	-1.15649	-0.138921	-0.377723	0.324462
130	8030	146.25	-1.02263	-0.110369	-0.340276	0.40116
132	8042.5	145.5	-1.04006	-0.157708	-0.213348	0.66113
134	8055	144.25	-1.08208	-0.157271	-0.241509	0.603453
136	8068	144.75	-0.976721	-0.148255	-0.415637	0.246807
138	8080	141.75	-0.990338	-0.196873	-0.20675	0.674644
140	8093	140.5	-0.939649	-0.139111	-0.259776	0.566037
142	8105	138.25	-0.871117	-0.129619	-0.296155	0.491527
144	8117	136.25	-0.822617	-0.128606	-0.203823	0.68064
146	8129	135.75	-0.863724	-0.141211	-0.248257	0.589631
148	8141	132	-0.935026	-0.134351	-0.275545	0.53374
150	8154	130	-0.917089	-0.149062	-0.145383	0.800334
152	8165.5	129.75	-0.806301	-0.123542	-0.107303	0.87833
154	8175.5	128.5	-0.831871	-0.117053	-0.146701	0.797635
156	8186.5	129.5	-0.842241	-0.105976	-0.242415	0.601597
158	8196.5	129	-0.85997	-0.12908	-0.0808817	0.932445
160	8206.5	129	-0.870002	-0.126431	-0.198621	0.691293
162	8217	128.75	-0.981442	-0.141236	-0.107246	0.878445
164	8227.5	128.5	-0.955884	-0.183992	-0.0934156	0.906773
166	8238	128.75	-0.950101	-0.132448	-0.195396	0.6979
168	8248.5	127.75	-0.930127	-0.149501	-0.253382	0.579135
170	8258.5	128.25	-0.965455	-0.15126	-0.273755	0.537407
172	8268.5	128.25	-0.99249	-0.169574	-0.0888539	0.916116
174	8278.5	127.25	-1.01048	-0.130678	-0.142463	0.806316
176	8288.5	127.5	-0.91031	-0.155101	-0.220374	0.646741
178	8298.5	127	-0.936637	-0.141597	-0.0944602	0.904634
180	8308.5	126.75	-1.01819	-0.153787	-0.138869	0.813676
182	8318.5	126.5	-0.930509	-0.159891	-0.0573155	0.980713
184	8328	125.5	-0.948156	-0.144228	-0.151542	0.787719
186	8337.5	125.75	-0.968893	-0.17306	-0.0317065	1.03316
188	8347.5	124	-0.829839	-0.151917	-0.0983222	0.896724
190	8357.5	123.5	-0.988311	-0.128595	-0.164802	0.760562
192	8367.5	122.75	-0.87998	-0.140955	-0.273812	0.537289
194	8378	122	-0.691451	-0.118953	-0.30045	0.48273
196	8387.5	121.75	-0.802463	-0.10574	-0.158818	0.772817
204	8424	120.25	-0.869503	-0.105508	-0.295632	0.492599
206	8431.5	121	-0.938871	-0.152564	-0.0495665	0.996584
208	8439	120.25	-0.91579	-0.1391	-0.114498	0.863594
210	8446.5	121	-0.946461	-0.111262	-0.243013	0.600373
212	8454	120.75	-0.899901	-0.120612	-0.168569	0.752845
214	8462	119.75	-0.835785	-0.124147	-0.117449	0.857548
216	8470	120.5	-0.945836	-0.126442	-0.126503	0.839004
218	8478	119.75	-0.902975	-0.120326	-0.0662798	0.962352
220	8486	119.75	-0.863939	-0.111999	-0.224906	0.637457
222	8494	119.5	-0.906055	-0.0997382	-0.189864	0.709229
224	8502	118.75	-0.866858	-0.109755	-0.224322	0.638655
226	8510	118.75	-0.856586	-0.115284	-0.349441	0.382389
228	8518	118	-0.777127	-0.0999751	-0.20223	0.683902
230	8526	118.25	-0.848855	-0.115827	-0.144813	0.801503
232	8533.5	118	-0.88121	-0.11707	-0.265983	0.553324
234	8541	117.5	-0.85191	-0.108611	-0.286775	0.510739
236	8548.5	117.25	-0.838766	-0.101872	-0.246251	0.59374
238	8556.5	116.25	-0.924205	-0.0947307	-0.216291	0.655103
240	8565	116	-0.894483	-0.103875	-0.217219	0.653202
242	8573	115.5	-0.843898	-0.122555	-0.129524	0.832817
244	8581	114.5	-0.801696	-0.106495	-0.197814	0.692948
246	8588	114.75	-0.928165	-0.123952	-0.207333	0.673451
248	8597	113.5	-0.956938	-0.103702	-0.254842	0.576144
250	8605	113.5	-0.956206	-0.117743	-0.182907	0.723478
252	8612	113	-0.790037	-0.136856	-0.169111	0.751735
254	8619	112.5	-0.914098	-0.0969205	-0.138651	0.814124
256	8625.5	112.75	-0.942981	-0.116442	-0.204468	0.679318
258	8631.5	112.25	-0.946806	-0.104825	-0.350758	0.379691
260	8637.5	113	-1.02421	-0.144314	-0.24848	0.589175
262	8644.5	113	-1.06472	-0.123839	-0.289289	0.50559
264	8650.5	112	-1.05396	-0.146572	-0.208286	0.671498
266	8656.5	112.5	-1.0651	-0.169701	0.00504304	1.10843
268	8663.5	112	-1.01098	-0.151283	-0.0276222	1.04153
270	8669.5	112.5	-1.14871	-0.14404	-0.0271629	1.04247
272	8675.5	112.5	-0.885894	-0.128813	-0.121253	0.849758
274	8681.5	112	-1.05524	-0.120066	-0.143974	0.803221
276	8688.5	112.5	-0.993738	-0.106739	-0.167699	0.754628
278	8694.5	112	-0.863374	-0.10366	-0.288436	0.507337
280	8700.5	112.5	-1.07611	-0.1201	-0.0930731	0.907475
282	8706.5	111.75	-1.09841	-0.136391	-0.0177223	1.06181
284	8712.5	111.5	-1.20683	-0.116351	-0.106473	0.88003
286	8718.5	111.25	-1.07498	-0.118206	-0.103299	0.886531
288	8725	110.75	-1.12078	-0.111226	-0.165934	0.758243
290	8731.5	110.25	-1.24779	-0.0873523	-0.421303	0.235202
292	8738	109.75	-1.21881	-0.115751	-0.162048	0.766202
294	8744.5	109	-0.683302	-0.101103	-0.0824305	0.929273
296	8750.5	109.5	-1.1535	-0.0953671	-0.419546	0.238802
302	8769.5	108.25	-1.02868	-0.120944	0.0215685	1.14228
304	8775.5	107.5	-1.11288	-0.0927581	-0.246575	0.593075
306	8781.5	108.5	-1.0211	-0.10492	-0.0711539	0.952369
308	8788	108	-0.825951	-0.118373	-0.100545	0.892171
310	8794.5	108.25	-1.14334	-0.0910968	-0.109158	0.87453
312	8800.5	108.75	-0.576836	-0.0845978	-0.0913539	0.910996
314	8806.5	108.5	-0.951949	-0.0994049	-0.116026	0.860464
316	8812.5	109.25	-1.06155	-0.122731	-0.162022	0.766256
318	8819	108.75	-1.14888	-0.131048	-0.134011	0.823626
320	8825.5	109	-1.20219	-0.120238	-0.120646	0.851001
322	8831.5	109.25	-1.11711	-0.108064	-0.837914	-0.618089
324	8837.5	108.75	-0.588911	-0.0716788	-0.479651	0.115696
326	8844.5	109	-0.97988	-0.089197	-0.222947	0.641469
328	8850.5	108.25	-0.709408	-0.10909	-0.314004	0.454969
330	8856.5	108.5	-0.882745	-0.0865758	-0.29407	0.495797
332	8862.5	108.75	-0.96389	-0.139681	-0.270843	0.543371
334	8867.5	109.25	-0.98696	-0.0979009	-0.270609	0.543851
336	8873.5	109.5	-0.842304	-0.0938518	-0.491192	0.0920571
338	8879.5	108.75	-0.927832	-0.0885475	-0.363383	0.353833
340	8884.5	108.75	-0.878163	-0.0953454	-0.36647	0.347511
342	8890.5	109	-0.796738	-0.0886929	-0.406609	0.265299
344	8895.5	109.75	-0.974258	-0.114253	-0.236662	0.613379
346	8901.5	110	-1.04677	-0.0950758	-0.22202	0.643369
348	8907.5	109.75	-0.932778	-0.115698	-0.265774	0.553753
350	8913.5	109.75	-0.888236	-0.112331	-0.281704	0.521126
352	8919	110	-0.933481	-0.0993146	-0.312301	0.458457
354	8924.5	109.5	-0.893411	-0.101934	-0.272504	0.539968
356	8930.5	109.5	-0.811642	-0.110465	-0.249626	0.586826
358	8935.5	109.5	-0.680472	-0.113448	-0.225604	0.636029
360	8941.5	109.75	-0.921481	-0.0706543	-0.414207	0.249737
362	8947.5	109.75	-1.00113	-0.104591	-0.322461	0.437648
364	8952.5	109.5	-1.00072	-0.088756	-0.597312	-0.125295
366	8958.5	109.25	-0.943574	-0.118309	-0.260612	0.564325
368	8964	108.5	-0.873426	-0.115159	-0.194544	0.699644
370	8969.5	108.75	-1.13978	-0.10288	-0.26809	0.54901
372	8975.5	109	-1.19053	-0.118157	-0.500902	0.0721709
374	8981	108.75	-1.14893	-0.0902282	-0.56663	-0.062452
376	8986.5	108.75	-1.1446	-0.13818	-0.252915	0.580091
378	8992.5	108	-1.18755	-0.133583	-0.164293	0.761603
380	8997.5	108.5	-1.08141	-0.124342	-0.201065	0.686288
382	9003.5	107.75	-1.08088	-0.0908627	-0.371729	0.336739
384	9009	108	-1.05703	-0.128593	-0.185165	0.718854
386	9014.5	108	-1.19296	-0.147397	-0.139852	0.811663
388	9020	107.5	-1.03008	-0.143769	-0.22222	0.642959
390	9025.5	107.5	-1.04568	-0.116707	-0.289815	0.504512
392	9031.5	107.5	-1.11083	-0.159105	-0.199679	0.689128
394	9036.5	107	-1.11156	-0.166698	-0.134014	0.823622
396	9042.5	107	-1.02717	-0.169602	-0.15747	0.775579
398	9048	106	-1.17917	-0.154823	-0.174856	0.739969
402	9059.5	105.25	-1.07354	-0.106708	-0.20415	0.67997
404	9066.5	104.5	-0.938303	-0.114239	-0.285601	0.513144
406	9073.5	105.25	-1.0644	-0.115162	-0.115903	0.860715
408	9081	105	-1.1461	-0.116226	-0.10388	0.885341
410	9088	105.75	-1.00005	-0.119291	-0.195379	0.697935
412	9095.5	105.25	-1.06314	-0.0966267	-0.185041	0.719109
414	9103	105.5	-1.13409	-0.136381	-0.264493	0.556377
416	9110	106	-1.14987	-0.124639	-0.334411	0.413172
418	9117	105.75	-1.13786	-0.105262	-0.325609	0.431201
420	9124.5	106	-1.06425	-0.119004	-0.113258	0.866133
422	9131.5	105.5	-1.17487	-0.14625	-0.223579	0.640176
432	9168	104.5	-1.08026	-0.122733	-0.278496	0.527696
434	9175	104.5	-1.12892	-0.121124	-0.249867	0.586333
436	9182.5	104.75	-1.16054	-0.0928398	-0.419116	0.239682
438	9190	103.75	-0.983312	-0.12641	-0.240631	0.605251
440	9197.5	104	-0.95782	-0.100775	-0.226602	0.633983
442	9204.5	103.75	-0.927596	-0.104016	-0.266762	0.551731
444	9211.5	103.25	-1.15814	-0.0659213	-0.723104	-0.382938
446	9218.5	103	-1.06467	-0.0885804	-0.13261	0.826497
448	9225	102.25	-1.12339	-0.117868	-0.196657	0.695318
450	9232	102.25	-1.08801	-0.141716	-0.212136	0.663613
452	9239	101.5	-1.07648	-0.0747851	-0.470251	0.13495
454	9246	100.75	-0.946984	-0.127923	-0.242746	0.600918
456	9254	101	-1.07833	-0.0998285	-0.581705	-0.0933278
458	9261	100.25	-1.04493	-0.120218	-0.27868	0.527319
460	9268	100.25	-1.10458	-0.143201	-0.321657	0.439294
462	9275	100	-1.09545	-0.0991474	-0.404087	0.270464
464	9282	99.75	-1.03436	-0.137261	-0.354069	0.372909
466	9289.5	99.75	-1.15428	-0.126501	-0.206289	0.675589
468	9297	99.25	-1.14669	-0.0975047	-0.306973	0.469371
470	9304	100.25	-1.09301	-0.0988761	-0.469493	0.136502
472	9311.5	100	-1.09497	-0.133783	-0.200495	0.687456
474	9319	100.25	-1.06708	-0.123008	-0.280642	0.523302
476	9326	100.5	-0.978736	-0.12026	-0.298971	0.485759
478	9333	100	-1.03189	-0.140226	-0.257385	0.570935
480	9341	100.5	-1.00085	-0.102402	-0.2913	0.501472
482	9349	100.5	-1.00477	-0.103531	-0.694017	-0.323363
484	9356	100.5	-0.970288	-0.0740256	-0.426378	0.224809
486	9364	100.75	-0.93044	-0.108979	-0.273523	0.537881
488	9371.5	99.75	-0.924662	-0.074524	-0.398063	0.282803
490	9378.5	100.25	-0.978205	-0.0807599	-0.440878	0.195109
492	9386	100	-1.00857	-0.0750301	-0.3192	0.444328
494	9394	99.5	-1.06369	-0.102825	-0.299767	0.48413
496	9401	99.75	-0.969992	-0.0967117	-0.309761	0.46366
498	9408.5	99	-1.05863	-0.0886155	-0.33284	0.41639
502	9424	98.5	-1.03089	-0.0887519	-0.272798	0.539367
504	9431.5	99	-0.940246	-0.0718743	-0.315007	0.452916
506	9439	100	-0.854802	-0.0740412	-0.398028	0.282873
508	9447	101.25	-0.830429	-0.0741504	-0.340293	0.401125
510	9454.5	103.75	-0.765508	-0.060179	-0.374283	0.331507
512	9462	105.5	-0.702098	-0.0629852	-0.372651	0.334851
514	9469	105.75	-1.01148	-0.0998209	-0.305655	0.47207
516	9477	108	-0.94515	-0.0934729	-0.288306	0.507604
518	9484	109	-0.946516	-0.0844475	-0.345307	0.390856
520	9491.5	110.75	-1.01227	-0.0481027	-0.473176	0.128958
522	9499	112.25	-0.860017	-0.0666761	-0.384296	0.310999
524	9507	113.5	-0.913767	-0.0859053	-0.299663	0.484343
526	9514	115.25	-0.995911	-0.117806	-0.269926	0.545249
528	9522	116	-0.902668	-0.0862201	-0.401616	0.275525
530	9529	117.5	-0.835418	-0.061981	-0.362587	0.355464
532	9537	118.25	-0.801119	-0.0660235	-0.533669	0.00505702
534	9544.5	119	-0.969021	-0.108559	-0.250375	0.585293
536	9552	121	-0.999315	-0.105094	-0.473859	0.127558
538	9559	121	-0.954199	-0.117583	-0.327117	0.428113
540	9567	123	-1.00278	-0.0927749	-0.379749	0.320312
542	9574	123.5	-1.03463	-0.0306892	-0.77699	-0.493307
544	9581.5	123.5	-1.01105	-0.114018	-0.317787	0.447221
546	9589	124.75	-0.970925	-0.0871789	-0.367866	0.344651
548	9596.5	125.5	-0.986639	-0.109024	-0.332383	0.417325
550	9604	126.5	-1.19676	-0.12575	-0.420579	0.236686
552	9612.5	128.5	-1.13635	0.0409531	-0.736517	-0.41041
554	9622.5	130.5	-1.10538	-0.0935859	-0.241254	0.603975
556	9632.5	134.25	-1.12415	-0.0826709	-0.284029	0.516364
558	9635	135	-0.949029	-0.101145	-0.257243	0.571226

## Sheet: metadata
Core name	PO362-2_33					Table S1
latitude	31.6932					column	name	unit	definition
longitude	29.7508					A	Core depth	cm	downcore depth of sample
Date/Time	2008-02-16T17:56:00					B	Age	yr BP	estimated age of the sample
elevation	-738.439					C	Error	yr	2-sigma uncertainty on age
Location	Mediterranean Sea					D	Log(S/Cl)		Log ratio of sulfur over chlorine
Campaign	POS362/2	http://oceanrep.geomar.de/1351/				E	Log(K/Ti)		Log ratio of potassium over titanium
Basis	Poseidon					F	Log(Ti/Ca)		Log ratio of titanium over calcium
Method/Device	Gravity Corer					G	Z-scored Log(Ti/Ca)		Z-scored Log ratio of titanium over calcium
