# Supplementary material for: Deoxygenation dynamics on the western Nile deep-sea fan during sapropel S1 from seasonal to millennial timescales
Source: Copernicus journal article supplement (doi:10.5194/cp-17-1025-2021), 2021-05-12
Supplement: Supplementary file 2 [file cp-17-1025-2021-supplement.zip]

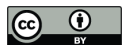

## *Supplement of*

# **Deoxygenation dynamics on the western Nile deep-sea fan during sapropel S1 from seasonal to millennial timescales**

**Cécile L. Blanchet et al.**

*Correspondence to:* Cécile L. Blanchet ([blanchet@gfz-potsdam.de](mailto:blanchet@gfz-potsdam.de))

- [cp-17-1025-2021-supplement-title-page.pdf](#)
- [V\\_Final](#)
  - [Blanchet\\_deox\\_Supplement\\_V2.pdf](#)
  - [Suppl\\_Table\\_S1.xls](#)
  - [Suppl\\_Table\\_S2.xls](#)
  - [Suppl\\_Table\\_S3.xls](#)
  - [Suppl\\_Table\\_S4.xls](#)
  - [Suppl\\_Table\\_S5.xls](#)
  - [Suppl\\_Table\\_S6.xls](#)

The copyright of individual parts of the supplement might differ from the article licence.
