# Supplementary material for: Deoxygenation dynamics on the western Nile deep-sea fan during sapropel S1 from seasonal to millennial timescales
Source: Copernicus journal article supplement (doi:10.5194/cp-17-1025-2021), 2021-05-12
Supplement: Supplementary file 2 [file Suppl_Table_S2.xls]

## Sheet: Read me
Blanchet, Cécile L; Tjallingii, Rik; Schleicher, Anja; Schouten, Stefan; Frank, Martin; Brauer, Achim (2020): XRF elemental contents and biomarkers of sediment core POS362-2_99.
In supplement of
Deoxygenation dynamics on the western Nile deep-sea fan during sapropel S1 from seasonal to millenial time-scales
Blanchet et al.

## Sheet: XRF-Tab S2
Core depth (cm	Age (yr BP)	error (2s)	Log(S/Cl)	Log(K/Ti)	Log(Ti/Ca)	Z-scored Log(Ti/Ca)
1	3.27273	12.2727	-1.19027	-0.218473	-0.838632	-0.997223
2	6.54545	24.5455	-1.21334	-0.23044	-0.893514	-1.12745
3	9.81818	36.8182	-1.2271	-0.286767	-0.631083	-0.504731
4	13.0909	49.0909	-1.23863	-0.282406	-0.664949	-0.585093
5	16.3636	61.3636	-1.22492	-0.348211	-0.55316	-0.319828
6	19.6364	73.6364	-1.23011	-0.322717	-0.554992	-0.324176
7	22.9091	85.9091	-1.23493	-0.315569	-0.561098	-0.338665
8	26.1818	98.1818	-1.23357	-0.316951	-0.519823	-0.240723
9	29.4545	110.455	-1.2212	-0.275603	-0.575038	-0.371744
10	32.7273	122.727	-1.23192	-0.290938	-0.51722	-0.234546
11	36	135	-1.20509	-0.235046	-0.591784	-0.41148
12	89	147.5	-1.23283	-0.257251	-0.497394	-0.187502
13	137	195	-1.18605	-0.258414	-0.451624	-0.0788943
14	182	260	-1.21063	-0.263942	-0.449556	-0.0739866
15	228	333	-1.23122	-0.289134	-0.438206	-0.0470552
16	273	401.5	-1.2143	-0.305668	-0.406427	0.0283528
17	332	405.5	-1.19765	-0.298749	-0.29779	0.286137
18	389	421.5	-1.22317	-0.358186	-0.262228	0.370523
19	449	446.5	-1.24881	-0.384361	-0.236173	0.432349
20	502	485.5	-1.23074	-0.331485	-0.286209	0.313618
21	555	534.5	-1.1671	-0.280229	-0.354545	0.151463
22	611	524	-1.14429	-0.266623	-0.352252	0.156906
23	672	520.5	-1.12787	-0.23951	-0.575139	-0.371981
24	731	526.5	-1.13123	-0.226772	-0.543295	-0.296419
25	790	551.5	-1.12921	-0.22934	-0.517967	-0.236318
25	790	551.5	-1.12668	-0.236737	-0.513587	-0.225927
25	790	551.5	-1.13501	-0.228742	-0.515793	-0.23116
26	844	589.5	-1.13059	-0.231447	-0.493525	-0.17832
27	895	578.5	-1.13135	-0.216793	-0.502572	-0.199789
28	954	572	-1.15207	-0.243967	-0.500586	-0.195075
29	1010	576	-1.1253	-0.235897	-0.556107	-0.326822
30	1062	594.5	-1.08657	-0.22271	-0.589275	-0.405527
31	1116	621.5	-1.08875	-0.205625	-0.676342	-0.612127
32	1180	610.5	-1.11289	-0.17491	-0.839516	-0.999322
33	1243	614	-1.1211	-0.165234	-0.884262	-1.1055
34	1307	633.5	-1.13413	-0.151904	-0.938142	-1.23335
35	1370	664.5	-1.10748	-0.129509	-1.02961	-1.45038
36	1426	704	-1.09294	-0.10419	-1.14303	-1.71952
37	1490	694	-1.10508	-0.103732	-1.08787	-1.58863
38	1553	701.5	-1.08997	-0.0941932	-1.16601	-1.77406
39	1613	720.5	-1.08137	-0.0697851	-1.21992	-1.90198
40	1673	751	-1.08565	-0.0584199	-1.28975	-2.06769
41	1734	792.5	-1.09851	-0.0390123	-1.2365	-1.94132
42	1793	779.5	-1.09325	-0.0636723	-1.07083	-1.5482
43	1859	771.5	-1.07911	-0.062739	-1.09321	-1.60131
44	1921	780.5	-1.09175	-0.0731117	-1.02657	-1.44319
45	1985	806	-1.07097	-0.0652574	-1.06009	-1.52273
46	2047	843.5	-1.09908	-0.0713837	-1.09259	-1.59983
47	2105	818	-1.11167	-0.101968	-0.962295	-1.29066
48	2166	802.5	-1.09624	-0.0638923	-1.12703	-1.68155
49	2230	797	-1.08799	-0.0598341	-1.17019	-1.78397
50	2299	808	-1.10494	-0.0569361	-1.19085	-1.83299
50	2299	808	-1.10325	-0.061722	-1.18774	-1.82561
50	2299	808	-1.09254	-0.0619594	-1.18328	-1.81504
51	2358	825.5	-1.13972	-0.0738582	-1.1808	-1.80916
52	2422	800.5	-1.08503	-0.0255504	-1.27419	-2.03076
53	2489	781.5	-1.09798	-0.0161824	-1.36301	-2.24153
54	2555	789.5	-1.12318	-0.0246211	-1.35046	-2.21173
55	2618	806	-1.11657	0.0411605	-1.56717	-2.72596
56	2687	828	-1.09697	0.0141881	-1.48518	-2.53141
57	2768	822	-1.10854	0.042339	-1.60717	-2.82088
58	2854	831	-1.11603	0.100468	-1.7272	-3.1057
59	2940	854	-1.10967	0.138732	-1.77661	-3.22294
60	3016	890.5	-1.11468	0.136071	-1.80116	-3.2812
61	3097	932.5	-1.1213	0.133937	-1.77073	-3.20898
62	3176	937	-1.08284	0.101189	-1.70091	-3.04331
63	3251	954.5	-1.07728	0.13557	-1.74736	-3.15355
64	3331	973.5	-1.06545	0.0915253	-1.63774	-2.89343
65	3407	1016	-1.09306	0.0834197	-1.64041	-2.89976
66			-0.875898	-0.110813	-1.63209	-2.88002
67			-1.3526	#NUM!	-0.411154	0.0171364
67.5			-1.01967	0.190991	-1.93476	-3.59823
68.5			-1.0194	0.180351	-1.96383	-3.6672
69.5			-1.06686	0.206067	-2.08043	-3.94387
70.5			-1.06627	0.182262	-2.05296	-3.87871
71.5			-1.08637	0.155751	-2.02789	-3.81922
72.5			-1.09302	0.195301	-2.02772	-3.8188
73.5			-1.06909	0.182643	-1.96993	-3.68167
74.5			-1.04706	0.128011	-1.81598	-3.31637
75.5			-1.04661	0.115429	-1.69758	-3.03542
76.5			-1.02581	0.131031	-1.75776	-3.17823
77.5			-1.03934	0.102598	-1.686	-3.00793
78.5			-1.04549	0.0895012	-1.7035	-3.04945
79.5			-1.04001	0.0833534	-1.63324	-2.88274
80.5			-1.049	0.0686844	-1.60841	-2.82384
81.5			-1.04259	0.029937	-1.38022	-2.28235
82.5			-1.05627	0.0015988	-1.3135	-2.12403
83.5			-0.997207	0.0316077	-1.35645	-2.22594
84.5			-1.03705	0.014616	-1.29375	-2.07717
85.5			-1.03819	0.030414	-1.33553	-2.17631
86.5			-1.05098	0.00332757	-1.27505	-2.0328
87.5			-1.05201	-0.0167544	-1.24801	-1.96864
88.5			-1.00761	-0.00264397	-1.25907	-1.99487
89.5			-0.998065	0.00150524	-1.22624	-1.91699
90.5			-1.05129	-0.0151019	-1.14502	-1.72425
91.5			-1.00614	0.0167881	-1.2863	-2.0595
91.5			-0.985634	0.0183564	-1.28496	-2.0563
91.5			-1.00623	0.00274057	-1.28199	-2.04926
92.5			-1.05328	0.00639269	-1.26297	-2.00414
93.5			-1.08322	0.00163161	-1.22519	-1.91449
94.5			-1.05958	-0.00299739	-1.21327	-1.88621
95.5			-1.05135	-0.00500087	-1.1482	-1.73179
96.5			-1.19013	-0.166509	-1.06976	-1.54566
97.5			-1.01502	-0.0594042	-1.13627	-1.70348
98.5			-0.995714	-0.0139089	-1.16468	-1.77091
99.5			-1.0206	-0.0235008	-1.14018	-1.71277
100.5			-1.07397	-0.0283545	-1.06951	-1.54507
101.5			-1.04552	-0.0200133	-1.09555	-1.60686
102.5			-1.01733	-0.0045261	-1.11957	-1.66385
103.5			-1.04864	-0.022605	-1.11694	-1.65761
104.5			-1.04924	-0.0215628	-1.08518	-1.58224
105.5			-1.04194	-0.0209695	-1.08215	-1.57507
106.5			-1.09446	-0.039403	-0.899937	-1.14269
107.5			-1.06578	-0.0640799	-0.818387	-0.949184
108.5			-1.05675	-0.0809807	-0.753317	-0.79478
109.5			-1.07308	-0.0649626	-0.706019	-0.682547
110.5			-1.07536	-0.0764151	-0.680204	-0.621291
111.5			-1.0627	-0.0742871	-0.63524	-0.514596
112.5			-1.0734	-0.0852476	-0.519263	-0.239394
113.5			-1.05494	-0.0704069	-0.522189	-0.246337
114.5			-1.05647	-0.0766508	-0.482783	-0.152832
115.5			-1.08521	-0.0917336	-0.467593	-0.116787
116.5			-1.06019	-0.0792873	-0.545684	-0.302088
116.5			-1.07241	-0.0927243	-0.530576	-0.266238
116.5			-1.06403	-0.086776	-0.540267	-0.289234
117.5			-1.03071	-0.0923297	-0.644065	-0.535536
118.5			-1.04274	-0.0883323	-0.625033	-0.490375
119.5			-1.03701	-0.0900802	-0.590814	-0.409178
120.5			-1.07762	-0.104553	-0.453367	-0.0830301
121.5			-1.04028	-0.099354	-0.445195	-0.06364
122.5			-1.05071	-0.0913192	-0.470548	-0.1238
123.5			-1.05218	-0.0912075	-0.515483	-0.230424
124.5			-1.06515	-0.100914	-0.493089	-0.177286
125.5			-1.0939	-0.0964049	-0.483417	-0.154336
126.5			-1.0464	-0.100803	-0.558148	-0.331664
127.5			-1.04185	-0.0890028	-0.519738	-0.240523
128.5			-1.05314	-0.104993	-0.508372	-0.213551
129.5			-1.06287	-0.0889252	-0.518462	-0.237493
130.5			-1.01209	-0.0825086	-0.508214	-0.213176
131.5			-1.02146	-0.089629	-0.531189	-0.267694
132.5			-1.04622	-0.0994576	-0.463341	-0.106698
133.5			-1.04733	-0.0955052	-0.522243	-0.246465
134.5			-0.990458	-0.0945444	-0.435789	-0.0413197
135.5			-1.0069	-0.0960974	-0.374171	0.104894
136.5			-0.992689	-0.0935755	-0.366362	0.123423
137.5			-1.00678	-0.0884054	-0.410322	0.0191116
138.5			-0.998389	-0.0820722	-0.451921	-0.0795987
139.5			-1.0068	-0.0840207	-0.376129	0.100248
140.5			-1.02191	-0.0882665	-0.379291	0.0927448
141.5			-1.02278	-0.0854321	-0.297835	0.286031
141.5			-1.0311	-0.0947959	-0.29067	0.303031
141.5			-1.03658	-0.099753	-0.290374	0.303734
142.5			-1.02968	-0.0849619	-0.400987	0.0412616
143.5			-1.02626	-0.0889458	-0.41364	0.0112378
144.5			-0.9974	-0.0815393	-0.385176	0.0787808
145.5			-0.996006	-0.0933579	-0.310632	0.255664
146.5			-0.986095	-0.0894164	-0.354776	0.150915
147.5			-0.996841	-0.0819872	-0.272328	0.346555
148.5			-1.02386	-0.100055	-0.263856	0.36666
149.5			-1.00486	-0.0962513	-0.205138	0.505991
150.5			-1.02068	-0.093094	-0.170679	0.587758
151.5			-0.987887	-0.100383	-0.128231	0.688482
152.5			-0.950398	-0.0949909	-0.221376	0.467459
153.5			-0.964271	-0.105599	-0.213014	0.487303
154.5			-1.04868	-0.0976905	-0.201484	0.514661
155.5			-1.00642	-0.131493	-0.163395	0.605042
156.5			-0.965788	-0.110783	-0.172246	0.584041
157.5			-1.00563	-0.111061	-0.192105	0.536917
158.5			-0.998873	-0.0994009	-0.160552	0.611789
159.5			-1.00012	-0.112902	-0.179466	0.566907
160.5			-1.01004	-0.09931	-0.222724	0.46426
161.5			-1.00601	-0.104889	-0.235295	0.434431
162.5			-1.00224	-0.10085	-0.18892	0.544474
163.5			-1.00859	-0.0974894	-0.264362	0.365459
164.5			-0.981898	-0.0872677	-0.218813	0.473541
165.5			-0.97156	-0.0972897	-0.186253	0.550802
166.5			-0.98421	-0.0909226	-0.258543	0.379266
166.5			-0.981085	-0.0910045	-0.262772	0.369232
166.5			-0.992632	-0.091769	-0.257658	0.381366
167.5			-0.717858	-0.146633	-0.367798	0.120015
168.5			-1.30293	#NUM!	-0.378996	0.0934447
169			-0.963462	-0.102353	-0.170618	0.587904
170			-0.966408	-0.0832938	-0.205502	0.505127
171			-0.971878	-0.0888078	-0.222773	0.464144
172			-0.969841	-0.100929	-0.198957	0.520658
173			-0.982672	-0.0987636	-0.192272	0.536521
174			-0.999277	-0.100967	-0.199795	0.518668
175			-1.0008	-0.106355	-0.145619	0.647224
176			-0.988295	-0.0979712	-0.189363	0.543423
177			-0.985979	-0.0989737	-0.173975	0.579938
178			-0.995245	-0.089701	-0.34694	0.16951
179			-0.978443	-0.107865	-0.225208	0.458368
180			-0.981392	-0.106837	-0.165869	0.599173
181			-0.968804	-0.109682	-0.171765	0.585181
182			-0.999968	-0.124415	-0.155728	0.623236
183			-1.01079	-0.117291	-0.116565	0.716166
184			-1.00635	-0.108387	-0.158724	0.616127
185			-1.00618	-0.0963921	-0.189519	0.543054
186			-0.992509	-0.119863	-0.143977	0.65112
187			-1.00417	-0.127595	-0.0744977	0.815987
188			-1.00264	-0.129059	-0.102079	0.750539
189			-0.997392	-0.10882	-0.124655	0.696969
190			-0.971596	-0.109743	-0.083222	0.795285
191			-0.982034	-0.105481	-0.18049	0.564478
192			-1.01006	-0.117402	-0.178478	0.569251
193			-0.989068	-0.120196	-0.17836	0.569532
193			-0.984323	-0.123684	-0.172227	0.584085
193			-1.00926	-0.128114	-0.170851	0.58735
194			-0.974206	-0.108581	-0.164951	0.601351
195			-0.976063	-0.116911	-0.147658	0.642384
196			-1.01835	-0.107375	-0.164368	0.602733
197			-0.944856	-0.106466	-0.137636	0.666166
198			-0.967121	-0.0963978	-0.154772	0.625504
199			-0.962846	-0.103841	-0.12305	0.700778
200			-0.980361	-0.104912	-0.176284	0.574459
201			-0.980036	-0.102665	-0.205794	0.504433
202			-0.998994	-0.105792	-0.188294	0.54596
203			-0.993663	-0.114065	-0.20186	0.51377
204			-1.01578	-0.116529	-0.187541	0.547746
205			-0.981492	-0.113768	-0.185567	0.552432
206			-1.01476	-0.112095	-0.188753	0.54487
207			-1.01115	-0.111338	-0.187738	0.54728
208			-0.988493	-0.10563	-0.207484	0.500424
209			-1.00296	-0.102943	-0.187764	0.547217
210			-1.00857	-0.125428	-0.14734	0.643139
211			-1.01594	-0.131479	-0.139515	0.661708
212			-0.970891	-0.124978	-0.122613	0.701815
213			-1.01819	-0.122998	-0.139137	0.662604
214			-1.01349	-0.120191	-0.149794	0.637316
215			-0.982999	-0.120369	-0.128311	0.688292
216			-1.01791	-0.119641	-0.142625	0.654327
217			-1.02162	-0.137085	-0.14626	0.645702
218			-1.03499	-0.139636	-0.148483	0.640426
218			-1.03114	-0.132503	-0.158069	0.617682
218			-1.03301	-0.138771	-0.144332	0.650277
219			-0.990376	-0.104405	-0.178692	0.568745
220			-1.01303	-0.112884	-0.157551	0.618909
221			-0.996576	-0.122484	-0.124854	0.696496
222			-1.01206	-0.132532	-0.0892934	0.780878
223			-1.01944	-0.129076	-0.117012	0.715104
224			-1.0175	-0.129146	-0.115875	0.717804
225			-1.00841	-0.130325	-0.148004	0.641563
226			-1.00478	-0.125802	-0.152977	0.629765
227			-1.00884	-0.115805	-0.144282	0.650395
228			-1.01213	-0.132754	-0.102498	0.749546
229			-1.01553	-0.146558	-0.142958	0.653537
230			-1.0126	-0.140116	-0.156613	0.621137
231			-1.02845	-0.118793	-0.223866	0.461552
232			-1.03711	-0.128431	-0.242263	0.417897
233			-1.03697	-0.126297	-0.227896	0.45199
234			-1.02847	-0.121859	-0.227846	0.452106
235			-1.01719	-0.133295	-0.241337	0.420095
236			-1.03296	-0.118117	-0.283689	0.319597
237			-1.00021	-0.108601	-0.379036	0.0933484
238			-1.04174	-0.115873	-0.352173	0.157093
239			-1.04082	-0.106823	-0.383522	0.0827043
240			-0.993872	-0.0924172	-0.389148	0.0693547
241			-1.01538	-0.0900568	-0.421354	-0.00706596
242			-1.00636	-0.0889782	-0.413168	0.0123587
243			-0.983181	-0.0946049	-0.357172	0.145229
243			-1.0011	-0.105107	-0.35565	0.148843
243			-1.01663	-0.0964394	-0.358035	0.143183
244			-0.988088	-0.0954373	-0.319523	0.234567
245			-1.00068	-0.0882043	-0.375929	0.100723
246			-0.994907	-0.104342	-0.331709	0.20565
247			-0.981804	-0.100929	-0.359177	0.140473
248			-0.964897	-0.105433	-0.28965	0.305454
249			-0.979316	-0.0921823	-0.325617	0.220107
250			-0.98151	-0.104035	-0.272647	0.3458
251			-0.983702	-0.103414	-0.241395	0.419956
252			-0.953575	-0.090801	-0.276291	0.337153
253			-0.990227	-0.103885	-0.241058	0.420756
254			-0.972769	-0.10593	-0.243936	0.413928
255			-0.979576	-0.0970601	-0.277361	0.334614
256			-1.00123	-0.100474	-0.463081	-0.106079
257			-0.966866	-0.0861217	-0.46914	-0.120457
258			-0.948832	-0.102335	-0.329922	0.209891
259			-0.962891	-0.127641	-0.159399	0.614526
260			-0.989752	-0.122487	-0.176791	0.573256
261			-0.985338	-0.10835	-0.206338	0.503144
262			-0.986639	-0.12038	-0.185323	0.55301
263			-0.911668	-0.112745	-0.211444	0.491028
264			-0.975743	-0.112462	-0.21446	0.483872
265			-0.971987	-0.104183	-0.215696	0.480938
266			-1.02748	-0.153272	-0.160617	0.611633
267			-0.984072	-0.113655	-0.169825	0.589786
268			-1.00259	-0.0985452	-0.205695	0.50467
268			-1.00418	-0.10715	-0.205851	0.504298
268			-1.00416	-0.0971534	-0.213937	0.485112
269			-0.712454	-0.158832	-0.194803	0.530514
270			-1.35112	#NUM!	-0.39294	0.0603575
270.5			-1.03522	-0.0898129	-0.169801	0.589841
271.5			-1.0224	-0.0884595	-0.225419	0.457865
272.5			-1.01264	-0.0934102	-0.230318	0.446241
273.5			-1.02068	-0.0894335	-0.20397	0.508762
274.5			-1.00774	-0.0847821	-0.237921	0.428201
275.5			-1.00924	-0.0898945	-0.240904	0.421121
276.5			-1.03549	-0.0831859	-0.223365	0.462741
277.5			-1.00255	-0.091505	-0.165776	0.599393
278.5			-1.02321	-0.0928599	-0.197994	0.522943
279.5			-1.03321	-0.0720113	-0.365976	0.124339
280.5			-1.03765	-0.0983037	-0.156535	0.62132
281.5			-1.0118	-0.0958228	-0.182543	0.559607
282.5			-1.02612	-0.0981361	-0.210277	0.493797
283.5			-1.04852	-0.0984161	-0.244334	0.412983
284.5			-1.02621	-0.0888843	-0.286026	0.314052
285.5			-1.04325	-0.0968616	-0.20398	0.508738
286.5			-1.03988	-0.102034	-0.256727	0.383576
287.5			-1.0429	-0.0877244	-0.232223	0.44172
288.5			-0.989726	-0.09574	-0.202233	0.512885
289.5			-1.02151	-0.107369	-0.158105	0.617595
290.5			-1.00216	-0.103665	-0.144819	0.649122
291.5			-0.96972	-0.101121	-0.194889	0.530311
292.5			-0.961663	-0.0999207	-0.200248	0.517595
293.5			-1.00728	-0.100021	-0.129361	0.685801
294.5			-0.974295	-0.0969288	-0.185583	0.552392
294.5			-1.00457	-0.101847	-0.181063	0.563118
294.5			-1.00375	-0.110441	-0.1813	0.562555
295.5			-0.983652	-0.0932827	-0.213871	0.485269
296.5			-0.961813	-0.0871805	-0.205194	0.505858
297.5			-1.02637	-0.103382	-0.159321	0.614711
298.5			-1.03822	-0.118196	-0.125356	0.695305
299.5			-0.958113	-0.100138	-0.176526	0.573883
300.5			-0.973029	-0.109158	-0.302448	0.275086
301.5			-1.00608	-0.103727	-0.234455	0.436425
302.5			-0.981572	-0.114541	-0.157115	0.619944
303.5			-0.991673	-0.110093	-0.169973	0.589434
304.5			-1.02556	-0.100661	-0.222477	0.464848
305.5			-0.995659	-0.101454	-0.249827	0.399948
306.5			-1.00401	-0.128659	-0.247085	0.406456
307.5			-1.01801	-0.135613	-0.235676	0.433529
308.5			-1.01966	-0.134467	-0.273156	0.34459
309.5			-1.00086	-0.110871	-0.226599	0.455066
310.5			-1.00625	-0.106332	-0.19965	0.519014
311.5			-1.01165	-0.108784	-0.184124	0.555855
312.5			-0.972935	-0.100772	-0.241036	0.420809
313.5			-1.00521	-0.116016	-0.194359	0.531568
314.5			-0.99641	-0.111973	-0.194278	0.531761
315.5			-0.999009	-0.121737	-0.15677	0.620763
316.5			-1.01751	-0.110749	-0.199201	0.520079
317.5			-1.02814	-0.118747	-0.183109	0.558264
318.5			-0.949318	-0.10925	-0.140792	0.658676
319.5			-0.758779	-0.105169	-0.136321	0.669285
319.5			-0.782979	-0.117787	-0.132942	0.677303
319.5			-0.7972	-0.107209	-0.138287	0.664622
320.5			-0.996446	-0.112697	-0.214455	0.483883
321.5			-0.971565	-0.104275	-0.196312	0.526935
322.5			-1.01089	-0.121356	-0.143635	0.651932
323.5			-0.981666	-0.122617	-0.130861	0.682243
324.5			-0.959346	-0.126812	-0.170648	0.587831
325.5			-0.914471	-0.122144	-0.118736	0.711014
326.5			-0.985928	-0.0938507	-0.388708	0.0703996
327.5			-0.98394	-0.0652614	-0.87889	-1.09275
328.5			-0.994267	-0.105887	-0.538467	-0.284965
329.5			-0.98274	-0.113469	-0.176745	0.573364
330.5			-0.985695	-0.135558	-0.173431	0.581229
331.5			-0.978119	-0.117337	-0.152557	0.630759
332.5			-0.973944	-0.113116	-0.187367	0.54816
333.5			-0.980056	-0.116021	-0.113788	0.722755
334.5			-0.962089	-0.115468	-0.152264	0.631456
335.5			-0.967052	-0.112008	-0.200025	0.518123
336.5			-0.965255	-0.103061	-0.250005	0.399526
337.5			-0.986685	-0.129294	-0.168901	0.591978
338.5			-0.971469	-0.105667	-0.195456	0.528965
339.5			-0.976761	-0.116339	-0.162671	0.60676
340.5			-0.972652	-0.119679	-0.187575	0.547666
341.5			-0.974098	-0.11992	-0.180928	0.56344
342.5			-0.965624	-0.104729	-0.145722	0.64698
343.5			-0.953133	-0.126461	-0.0647089	0.839214
344.5			-0.963802	-0.122933	-0.100994	0.753114
344.5			-0.939414	-0.125171	-0.0965224	0.763724
344.5			-0.962893	-0.123479	-0.0981972	0.75975
345.5			-0.970824	-0.141884	-0.0949385	0.767483
346.5			-0.948841	-0.122135	-0.0994534	0.756769
347.5			-0.944927	-0.116088	-0.188153	0.546293
348.5			-0.947573	-0.117518	-0.164107	0.603352
349.5			-0.948281	-0.126082	-0.0879461	0.784075
350.5			-0.94992	-0.121768	-0.100024	0.755415
351.5			-0.953054	-0.125461	-0.104421	0.744982
352.5			-0.957909	-0.108927	-0.194188	0.531974
353.5			-0.958741	-0.130373	-0.191518	0.538309
354.5			-0.949493	-0.111151	-0.187474	0.547906
355.5			-0.960291	-0.10612	-0.186866	0.549349
356.5			-0.954297	-0.120251	-0.194628	0.530929
357.5			-0.946496	-0.114	-0.172472	0.583504
358.5			-0.970773	-0.115011	-0.170236	0.588809
359.5			-0.936391	-0.121597	-0.206203	0.503465
360.5			-0.967947	-0.126848	-0.198992	0.520575
361.5			-0.942951	-0.12345	-0.202546	0.512142
362.5			-0.944603	-0.126766	-0.288424	0.308363
363.5			-0.910084	-0.122707	-0.186985	0.549065
364.5			-0.933626	-0.12319	-0.154206	0.626847
365.5			-0.911529	-0.11377	-0.201403	0.514854
366.5			-0.929809	-0.104636	-0.426763	-0.0199013
367.5			-0.916334	-0.109291	-0.451055	-0.077544
368.5			-0.910088	-0.123174	-0.329403	0.211124
369.5			-0.872344	-0.116822	-0.226145	0.456143
369.5			-0.875815	-0.131353	-0.222601	0.464554
369.5			-0.868857	-0.124257	-0.225333	0.458071
370.5			-1.37762	#NUM!	-0.414973	0.00807381
371			-0.860515	-0.106867	-0.193108	0.534536
372			-0.896365	-0.106677	-0.163184	0.605543
373			-0.907851	-0.103294	-0.196824	0.525719
374			-0.931895	-0.0936677	-0.232725	0.44053
375			-0.918895	-0.113547	-0.144367	0.650193
376			-0.922025	-0.112168	-0.149999	0.63683
377			-0.894969	-0.110834	-0.119482	0.709243
378			-0.931575	-0.109583	-0.0512879	0.871061
379			-0.89713	-0.109819	-0.175093	0.577284
380			-0.91329	-0.10155	-0.263374	0.367803
381			-0.90734	-0.0993944	-0.247747	0.404884
382			-0.908639	-0.115959	-0.116471	0.716389
383			-0.916156	-0.107828	-0.135001	0.672418
384			-0.927639	-0.117981	-0.140883	0.658461
385			-0.920261	-0.1231	-0.15334	0.628902
386			-0.938836	-0.126964	-0.115082	0.719684
387			-0.928784	-0.111727	-0.164667	0.602024
388			-0.938981	-0.102085	-0.123127	0.700595
389			-0.919042	-0.121948	-0.0602331	0.849835
390			-0.934997	-0.115558	-0.199965	0.518266
391			-0.952535	-0.114562	-0.202734	0.511696
392			-0.816605	-0.116152	-0.0800709	0.802762
393			-0.883101	-0.109062	-0.136974	0.667737
394			-0.918258	-0.117073	-0.130183	0.683852
395			-0.937966	-0.11236	-0.15988	0.613383
395			-0.960456	-0.121946	-0.158143	0.617505
395			-0.957432	-0.106709	-0.161067	0.610566
396			-0.897206	-0.109146	-0.19016	0.541532
397			-0.640847	-0.121387	-0.107331	0.738076
398			-0.945157	-0.132535	-0.0977994	0.760694
399			-0.958443	-0.11919	-0.0795257	0.804056
400			-0.874343	-0.0920622	-0.173142	0.581914
401			-0.91563	-0.110584	-0.156792	0.620711
402			-0.908191	-0.118168	-0.125344	0.695335
403			-0.968387	-0.0953084	-0.50726	-0.210913
404			-0.971584	-0.0612536	-0.978856	-1.32996
405			-0.902267	-0.0865294	-1.00646	-1.39545
406			-0.945108	-0.117947	-0.373054	0.107543
407			-0.897904	-0.126692	-0.187197	0.548563
408			-0.906125	-0.122927	-0.184109	0.555891
409			-0.905803	-0.11291	-0.259441	0.377136
410			-0.948121	-0.101772	-0.34488	0.174398
411			-0.899528	-0.124266	-0.218888	0.473364
412			-0.799871	-0.12334	-0.17906	0.567871
413			-0.819534	-0.125336	-0.116444	0.716452
414			-0.8675	-0.119957	-0.216305	0.479492
415			-0.88946	-0.122802	-0.303104	0.273528
416			-0.915943	-0.123836	-0.287425	0.310733
417			-0.94639	-0.118372	-0.230731	0.44526
418			-0.924756	-0.11308	-0.300991	0.278541
419			-0.912282	-0.121711	-0.24005	0.423148
420			-0.93393	-0.11389	-0.234252	0.436907
420			-0.946705	-0.122307	-0.227449	0.45305
420			-0.956184	-0.124165	-0.2297	0.447707
421			-0.953838	-0.114754	-0.245551	0.410095
422			-0.94875	-0.0945751	-0.378471	0.0946901
423			-0.982199	-0.114664	-0.275885	0.338116
424			-0.950799	-0.114483	-0.255185	0.387234
425			-0.956443	-0.109647	-0.338448	0.18966
426			-1.0023	-0.104904	-0.23944	0.424596
427			-0.997571	-0.116015	-0.21443	0.483943
428			-1.01429	-0.120827	-0.212039	0.489615
429			-1.01411	-0.108168	-0.204692	0.507048
430			-1.02295	-0.117056	-0.249493	0.400742
431			-1.01385	-0.114386	-0.304689	0.269768
432			-1.05116	-0.123182	-0.355168	0.149987
433			-1.02306	-0.110978	-0.328189	0.214004
434			-0.923996	-0.108926	-0.261881	0.371346
435			-0.883634	-0.105223	-0.298476	0.284509
436			-0.998016	-0.113785	-0.256993	0.382944
437			-0.981886	-0.105166	-0.209759	0.495027
438			-1.06477	-0.109997	-0.221261	0.467733
439			-1.02986	-0.121935	-0.222951	0.463723
440			-1.02118	-0.100208	-0.175544	0.576215
441			-1.02892	-0.115615	-0.21638	0.479315
442			-1.03006	-0.128577	-0.170403	0.588414
443			-0.984495	-0.120692	-0.158156	0.617474
444			-1.01148	-0.109735	-0.186083	0.551207
445			-0.982166	-0.113721	-0.180764	0.563827
445			-0.98725	-0.108596	-0.185704	0.552105
445			-1.00867	-0.11629	-0.177684	0.571135
446			-1.01019	-0.125072	-0.210399	0.493506
447			-1.04558	-0.119017	-0.238686	0.426385
448			-1.06781	-0.115287	-0.377395	0.0972435
449			-1.03725	-0.0884004	-0.542296	-0.29405
450			-1.06041	-0.116493	-0.28233	0.322822
451			-1.07883	-0.11765	-0.288254	0.308765
452			-1.06826	-0.126629	-0.242641	0.417
453			-1.03091	-0.12548	-0.24066	0.421701
454			-1.0839	-0.11764	-0.291101	0.302011
455			-1.04645	-0.105633	-0.345268	0.173477
456			-1.0413	-0.109753	-0.256667	0.383717
457			-1.05045	-0.138287	-0.277132	0.335157
458			-1.07578	-0.120779	-0.272137	0.34701
459			-1.06529	-0.101848	-0.349628	0.163132
460			-1.05439	-0.109943	-0.172615	0.583165
461			-1.08317	-0.110874	-0.20893	0.496992
462			-1.06279	-0.118116	-0.17338	0.581349
463			-1.05129	-0.113827	-0.148824	0.639618
464			-1.01724	-0.11642	-0.14274	0.654055
465			-1.06983	-0.124549	-0.105122	0.743319
466			-1.06576	-0.119248	-0.0855733	0.789705
467			-1.0646	-0.124625	-0.142246	0.655226
468			-1.03271	-0.123396	-0.211936	0.48986
469			-1.04852	-0.0970031	-0.270418	0.35109
470			-0.931263	-0.118389	-0.252499	0.393609
470			-0.919458	-0.11229	-0.252854	0.392767
470			-0.902126	-0.112281	-0.251172	0.396757
471			-0.907813	-0.219435	-0.100927	0.753274
472			-1.3482	#NUM!	-0.393817	0.0582758
472			-0.966102	-0.0838213	-0.344393	0.175554
473			-0.986387	-0.101525	-0.253569	0.39107
474			-0.953983	-0.0906958	-0.227968	0.451818
475			-0.994391	-0.0968228	-0.145888	0.646586
476			-0.988741	-0.0882375	-0.213637	0.485824
477			-0.957633	-0.0901538	-0.27828	0.332434
478			-0.940931	-0.097067	-0.212599	0.488287
479			-0.981202	-0.0822864	-0.24842	0.403288
480			-0.958559	-0.0893653	-0.227049	0.453997
481			-0.972141	-0.0975104	-0.220345	0.469907
482			-0.967841	-0.111277	-0.176871	0.573065
483			-0.968748	-0.10543	-0.177074	0.572585
484			-0.989291	-0.116269	-0.245642	0.40988
485			-0.99548	-0.10217	-0.209484	0.495679
486			-0.997897	-0.118773	-0.240067	0.423108
487			-1.00191	-0.0930084	-0.291399	0.301303
488			-0.996977	-0.100894	-0.228202	0.451262
489			-0.992391	-0.100505	-0.404093	0.0338921
490			-1.01529	-0.0746386	-0.471166	-0.125265
491			-0.960866	-0.0776328	-0.420577	-0.00522256
492			-0.960047	-0.0960257	-0.273263	0.344339
493			-0.97733	-0.0928927	-0.209942	0.494591
494			-0.953617	-0.0817653	-0.198081	0.522737
495			-0.84016	-0.108912	-0.214452	0.483889
496			-0.943503	-0.0874301	-0.229615	0.447909
496			-0.935082	-0.0888738	-0.229154	0.449004
496			-0.949124	-0.0915027	-0.229265	0.448739
497			-0.95766	-0.082956	-0.260238	0.375244
498			-0.988496	-0.0816647	-0.218923	0.473281
499			-0.986827	-0.0784588	-0.218393	0.474538
500			-0.990108	-0.0728465	-0.264026	0.366255
501			-0.975921	-0.0850249	-0.237938	0.428159
502			-0.982423	-0.0889481	-0.196914	0.525505
503			-0.957945	-0.0848766	-0.235854	0.433104
504			-0.949488	-0.0765155	-0.219337	0.472297
505			-0.937673	-0.0901732	-0.176208	0.574639
506			-0.942209	-0.101507	-0.192822	0.535215
507			-0.948676	-0.0988364	-0.23638	0.431856
508			-0.970367	-0.0965044	-0.267208	0.358706
509			-0.936251	-0.0844005	-0.330891	0.207592
510			-0.921204	-0.107993	-0.210967	0.492159
511			-0.935542	-0.11391	-0.182732	0.559157
512			-0.932465	-0.0972664	-0.22521	0.458363
513			-0.903865	-0.0989287	-0.198292	0.522235
514			-0.887867	-0.110177	-0.226693	0.454844
515			-0.897832	-0.108965	-0.234673	0.435907
516			-0.906689	-0.101853	-0.11641	0.716534
517			-0.861025	-0.0998198	-0.165489	0.600074
518			-0.9022	-0.0841976	-0.236606	0.431322
519			-0.837452	-0.108339	-0.113244	0.724046
520			-0.873777	-0.114814	-0.187621	0.547556
521			-0.912241	-0.0471194	-0.865326	-1.06057
521			-0.911475	-0.0446408	-0.870638	-1.07317
521			-0.925008	-0.0485982	-0.866768	-1.06399
522			-0.910709	-0.0874509	-0.189587	0.542892
523			-0.873189	-0.0885458	-0.218155	0.475104
524			-0.911849	-0.0842306	-0.232589	0.440853
525			-0.880696	-0.0900891	-0.233032	0.439801
526			-0.881227	-0.109525	-0.255407	0.386708
527			-0.903097	-0.11339	-0.293687	0.295873
528			-0.871055	-0.0962462	-0.262018	0.37102
529			-0.891594	-0.0927043	-0.231091	0.444407
530			-0.899805	-0.101032	-0.211143	0.491741

## Sheet: metadata
Core name	PO362-2_99			Table S2
latitude	31.9533			column	name	unit	definition
longitude	30.1597			A	Core depth	cm	downcore depth of sample
Date/Time	2008-02-22T06:26:00			B	Age	yr BP	estimated age of the sample
elevation	-396.15			C	Error	yr	2-sigma uncertainty on age
Location	Mediterranean Sea			D	Log(S/Cl)		Log ratio of sulfur over chlorine
Campaign	POS362/2			E	Log(K/Ti)		Log ratio of potassium over titanium
Basis	Poseidon			F	Log(Ti/Ca)		Log ratio of titanium over calcium
Method/Device	Gravity Corer			G	Z-scored Log(Ti/Ca)		Z-scored Log ratio of titanium over calcium
