# Supplementary material for: Deoxygenation dynamics on the western Nile deep-sea fan during sapropel S1 from seasonal to millennial timescales
Source: Copernicus journal article supplement (doi:10.5194/cp-17-1025-2021), 2021-05-12
Supplement: Supplementary file 3 [file Suppl_Table_S3.xls]

## Sheet: Read me
Blanchet, Cécile L; Tjallingii, Rik; Schleicher, Anja; Schouten, Stefan; Frank, Martin; Brauer, Achim (2020): XRF elemental contents of sediment core POS362-2_73.
In supplement of
Deoxygenation dynamics on the western Nile deep-sea fan during sapropel S1 from seasonal to millenial time-scales
Blanchet et al.

## Sheet: XRF-Tab S3
Core depth (cm	Age (yr BP)	error (2s)	Log(S/Cl)	Log(K/Ti)	Log(Ti/Ca)	Z-scored Log(Ti/Ca)
6.5	32.9333	77.7833	-1.63614	-0.399078	-0.570247	-0.455533
7.5	38	89.75	-1.64036	-0.404541	-0.537014	-0.396743
8.5	43.0667	101.717	-1.647	-0.392694	-0.581375	-0.475219
9.5	48.1333	113.683	-1.65308	-0.414511	-0.457173	-0.255504
10.5	53.2	125.65	-1.64011	-0.441466	-0.301261	0.0203067
11.5	58.2667	137.617	-1.6499	-0.466736	-0.202823	0.194443
12.5	63.3333	149.583	-1.6558	-0.456595	-0.263969	0.0862759
13.5	68.4	161.55	-1.65556	-0.460097	-0.26721	0.0805418
14.5	73.4667	173.517	-1.64776	-0.454373	-0.315761	-0.00534472
15.5	104	188.75	-1.66589	-0.446798	-0.349154	-0.0644165
16.5	160	221.25	-1.65394	-0.446212	-0.331423	-0.033051
17.5	214	273.25	-1.66948	-0.449333	-0.296284	0.0291099
18.5	264.5	333.5	-1.63456	-0.392408	-0.61893	-0.541653
19.5	313.5	398.75	-1.63606	-0.346002	-0.811855	-0.88294
20.5	363.5	429.75	-1.61855	-0.299917	-0.955085	-1.13631
21.5	414	429	-1.5993	-0.322137	-0.899663	-1.03827
22.5	464	438.5	-1.60399	-0.257677	-1.08697	-1.36962
23.5	513	458.75	-1.60188	-0.260516	-1.05911	-1.32033
24.5	560	489.25	-1.59753	-0.313861	-1.02512	-1.26021
25.5	607	504	-1.60945	-0.290978	-1.07385	-1.34641
26.5	656	501	-1.69214	-0.298722	-1.0838	-1.36402
27.5	706	506	-1.57256	-0.263241	-1.10516	-1.4018
28.5	754	519.5	-1.57706	-0.263512	-1.10468	-1.40096
29.5	800	541.25	-1.59412	-0.255042	-1.0826	-1.36189
30.5	849.5	548.75	-1.62044	-0.258262	-1.05614	-1.31508
31.5	901.5	540.5	-1.59797	-0.259534	-1.05123	-1.30639
32.5	954.5	539.75	-1.63253	-0.277312	-0.987007	-1.19279
33.5	1007	547.25	-1.6087	-0.285357	-0.935721	-1.10206
34.5	1057.5	564.75	-1.63086	-0.294672	-0.923478	-1.0804
35.5	1107	569.75	-1.61878	-0.288793	-0.93491	-1.10063
36.5	1156.5	561	-1.6348	-0.28871	-0.912874	-1.06164
37.5	1208.5	559.75	-1.62594	-0.276378	-0.930449	-1.09273
38.5	1260.5	564	-1.63667	-0.283352	-0.926841	-1.08635
39.5	1309.5	574.25	-1.62248	-0.273289	-0.980122	-1.18061
40.5	1356.5	572.75	-1.63795	-0.286156	-0.9444	-1.11741
41.5	1404.5	559.75	-1.59869	-0.242465	-1.08103	-1.35912
42.5	1454	553.25	-1.57572	-0.208663	-1.15393	-1.48807
43.5	1504	554.5	-1.59916	-0.209737	-1.14765	-1.47697
44.5	1553	563.25	-1.56262	-0.15053	-1.31864	-1.77945
45.5	1597.5	559	-1.54154	-0.123616	-1.39156	-1.90844
46.5	1640.5	541.5	-1.53449	-0.148259	-1.32623	-1.79288
47.5	1684.5	531.5	-1.53321	-0.0856751	-1.50288	-2.10537
48.5	1729.5	531	-1.48572	-0.0554426	-1.57731	-2.23704
49.5	1773.5	537.5	-1.48839	-0.0539982	-1.58618	-2.25272
50.5	1813	532.5	-1.48738	-0.0638912	-1.53982	-2.17071
51.5	1850.5	516.75	-1.46942	-0.0630307	-1.53935	-2.16988
52.5	1889.5	507.5	-1.49136	-0.0532998	-1.56547	-2.2161
53.5	1930	503.75	-1.48693	-0.0411839	-1.59441	-2.26729
54.5	1969.5	506.75	-1.50872	-0.0233662	-1.63292	-2.33542
55.5	2008	500.5	-1.47342	-0.0174553	-1.61336	-2.3008
56.5	2046.5	483.75	-1.48233	-0.0313656	-1.5942	-2.26691
57.5	2085	473	-1.49301	-0.0107918	-1.63862	-2.34549
58.5	2124.5	467.75	-1.48932	-0.0120819	-1.6296	-2.32954
59.5	2164.5	468.5	-1.49905	-0.0208728	-1.61238	-2.29907
60.5	2202	457	-1.51238	-0.0288148	-1.60922	-2.29349
61.5	2239.5	431.75	-1.51605	-0.0379831	-1.56213	-2.21018
62.5	2279	412.75	-1.49015	-0.0295362	-1.60112	-2.27916
63.5	2320.5	401.5	-1.48621	-0.0113679	-1.66223	-2.38726
64.5	2362	397	-1.42268	-0.00892182	-1.67658	-2.41265
65.5	2400	381	-1.46851	-0.0157452	-1.66474	-2.3917
66.5	2436.5	352.5	-1.4669	0.00249023	-1.72191	-2.49284
67.5	2474.5	330.5	-1.47767	-0.00614288	-1.71138	-2.47421
68.5	2514.5	318.5	-1.48079	-0.00683174	-1.70697	-2.46641
69.5	2555	314.25	-1.47513	0.0223927	-1.79215	-2.6171
70.5	2592.5	287.5	-1.45031	0.0372395	-1.82642	-2.67771
71.5	2628	240.25	-1.43275	0.0381796	-1.85668	-2.73125
72.5	2664	201.25	-1.41641	0.0392206	-1.851	-2.72119
73.5	2701	177.75	-1.4291	0.0433252	-1.84624	-2.71278
77.22	2974.46	267.87	-1.4064	0.0591394	-1.84511	-2.71077
78.22	3067.02	353.24	-1.42777	0.0577258	-1.88329	-2.77833
79.22	3158.24	446.23	-1.41854	0.0519868	-1.84499	-2.71057
80.22	3251.78	511.93	-1.41406	0.0305328	-1.78288	-2.60069
81.22	3352.54	473.93	-1.42293	0.0209819	-1.76275	-2.56508
82.22	3460.42	458.4	-1.40608	0.0201294	-1.76051	-2.56111
83.22	3572.08	457.25	-1.41817	0.0253889	-1.76788	-2.57417
84.22	3683.22	474.37	-1.42893	0.0033481	-1.70483	-2.46262
85.22	3772.34	499.29	-1.42356	0.010795	-1.70973	-2.47129
86.22	3818.68	495.55	-1.46747	-0.00582665	-1.6516	-2.36847
87.22	3862.68	500.58	-1.39889	-0.0316969	-1.60047	-2.27801
88.22	3906.24	517.11	-1.44424	-0.0376	-1.59341	-2.26552
89.22	3947.36	543.6	-1.4507	-0.0516139	-1.5603	-2.20695
90.22	3985.14	566.12	-1.47177	-0.068725	-1.51961	-2.13497
91.22	4021.92	564.1	-1.45271	-0.0899164	-1.45592	-2.02229
92.22	4058.14	570.09	-1.47943	-0.097852	-1.41499	-1.9499
93.22	4094.7	581.24	-1.41906	-0.117523	-1.36375	-1.85925
94.22	4129.48	599.89	-1.51265	-0.13061	-1.31248	-1.76855
95.22	4164.58	617.9	-1.50666	-0.134982	-1.29987	-1.74624
96.22	4203.36	614.11	-1.51652	-0.15263	-1.25057	-1.65904
97.22	4241.14	616.04	-1.52264	-0.170715	-1.18905	-1.55019
98.22	4277.92	624.58	-1.48804	-0.143503	-1.27586	-1.70377
99.22	4313.92	639.9	-1.53484	-0.172059	-1.182	-1.53773
100.22	4350.36	653.41	-1.52456	-0.172055	-1.18525	-1.54347
101.22	4388.58	644.9	-1.52272	-0.190921	-1.13	-1.44573
102.22	4427.8	641.55	-1.50648	-0.200035	-1.10479	-1.40114
103.22	4467.36	645.04	-1.52493	-0.200972	-1.09667	-1.38678
104.22	4505.14	653.91	-1.54226	-0.205159	-1.09059	-1.37602
105.22	4542.36	664.46	-1.52763	-0.222429	-1.04031	-1.28708
106.22	4580.14	659.11	-1.54589	-0.217381	-1.04044	-1.28731
107.22	4617.8	660.49	-1.53428	-0.212167	-1.05133	-1.30657
108.22	4657.36	665.98	-1.54917	-0.210156	-1.061	-1.32367
109.22	4695.58	676.08	-1.5563	-0.201554	-1.09504	-1.3839
110.22	4734.8	685.13	-1.55002	-0.215409	-1.03567	-1.27887
111.22	4774.8	678.17	-1.52415	-0.223664	-1.01428	-1.24103
112.22	4814.8	677.66	-1.50112	-0.230001	-0.984797	-1.18888
113.22	4855.24	680.88	-1.53923	-0.232757	-0.96369	-1.15154
114.22	4896.36	687.74	-1.54969	-0.233063	-0.956075	-1.13807
115.22	4934.14	698.69	-1.55068	-0.225109	-0.971841	-1.16596
116.22	4972.24	689.62	-1.53815	-0.244227	-0.883157	-1.00907
117.22	5013.8	687.27	-1.53706	-0.240434	-0.905941	-1.04938
118.22	5053.58	691.87	-1.5596	-0.246171	-0.89124	-1.02337
119.22	5092.58	700.7	-1.51525	-0.248306	-0.871118	-0.987777
120.22	5132.02	706.52	-1.52326	-0.247113	-0.866939	-0.980384
121.22	5172.58	699.17	-1.53846	-0.249466	-0.8544	-0.958203
122.22	5211.58	698.66	-1.51705	-0.248591	-0.862402	-0.972359
123.22	5250.36	701.55	-1.52046	-0.242758	-0.863308	-0.973961
124.22	5288.58	705.7	-1.48793	-0.244014	-0.87495	-0.994556
125.22	5327.8	710.42	-1.51149	-0.252789	-0.859763	-0.96769
126.22	5368.02	697.41	-1.50029	-0.248498	-0.861933	-0.971529
127.22	5408.36	689.01	-1.51698	-0.256493	-0.83017	-0.915339
128.22	5446.8	686.16	-1.47819	-0.252046	-0.83807	-0.929314
129.22	5486.8	689.6	-1.50706	-0.250638	-0.827112	-0.90993
130.22	5526.36	690.53	-1.52353	-0.240873	-0.851653	-0.953343
131.22	5564.8	678.35	-1.50797	-0.244138	-0.84044	-0.933507
132.22	5604.8	672.17	-1.48445	-0.241541	-0.831058	-0.91691
133.22	5644.58	671.66	-1.50472	-0.244037	-0.81752	-0.892961
134.22	5683.8	675.43	-1.5194	-0.248316	-0.818898	-0.8954
135.22	5723.36	677.64	-1.49986	-0.256798	-0.778611	-0.824131
136.22	5761.8	665.52	-1.50118	-0.26273	-0.745728	-0.765962
137.22	5801.8	657.84	-1.50943	-0.263732	-0.736218	-0.749138
138.22	5841.8	656.05	-1.50635	-0.268575	-0.72343	-0.726516
139.22	5881.8	660.2	-1.48808	-0.270649	-0.724116	-0.727729
140.22	5921.58	665.03	-1.49363	-0.266741	-0.706583	-0.696713
141.22	5961.02	651.97	-1.49346	-0.278771	-0.664736	-0.622686
142.22	6002.02	641.46	-1.4885	-0.28385	-0.633019	-0.566577
143.22	6043.02	635.34	-1.48597	-0.278736	-0.661643	-0.617213
144.22	6083.8	634.21	-1.48236	-0.271328	-0.668929	-0.630102
145.22	6123.36	633.66	-1.48073	-0.270862	-0.680011	-0.649706
146.22	6161.14	613.2	-1.48073	-0.265766	-0.710547	-0.703726
147.22	6198.36	600.29	-1.47882	-0.272656	-0.653278	-0.602415
148.22	6236.8	594.9	-1.4764	-0.273529	-0.64817	-0.593379
149.22	6276.58	592.1	-1.4682	-0.268661	-0.676227	-0.643012
150.22	6315.8	591.93	-1.45318	-0.272577	-0.62044	-0.544324
151.22	6356.02	573.65	-1.43525	-0.277734	-0.620427	-0.544303
152.22	6397.02	558.13	-1.44816	-0.283836	-0.559524	-0.436563
153.22	6438.46	551.06	-1.403	-0.287432	-0.531068	-0.386225
154.22	6481.02	550.27	-1.4114	-0.289686	-0.526354	-0.377886
155.22	6521.36	547.61	-1.41585	-0.292525	-0.512389	-0.353181
156.22	6559.58	525.09	-1.40805	-0.295872	-0.479464	-0.294937
157.22	6598.58	511.02	-1.39836	-0.300975	-0.473885	-0.285069
158.22	6637.58	503.78	-1.37352	-0.301139	-0.460398	-0.261209
159.22	6677.02	503.66	-1.36688	-0.30282	-0.441911	-0.228505
160.22	6717.14	499.18	-1.35338	-0.306083	-0.423959	-0.196748
161.22	6754.36	469.61	-1.33836	-0.306393	-0.438191	-0.221925
162.22	6792.8	446.87	-1.32661	-0.305939	-0.421221	-0.191905
163.22	6832.58	432.02	-1.3241	-0.307371	-0.412721	-0.176868
164.22	6871.8	424.67	-1.32724	-0.312438	-0.3672	-0.0963407
165.22	6910.92	415.58	-1.27768	-0.320504	-0.324773	-0.0212876
166.22	6946.92	380.13	-1.24523	-0.321173	-0.315953	-0.00568432
167.22	6983.58	348.5	-1.25141	-0.323297	-0.304384	0.0147815
168.22	7022.8	325.48	-1.24221	-0.322325	-0.319261	-0.0115355
169.22	7062.8	312.56	-1.21383	-0.326707	-0.271324	0.0732651
170.22	7099.06	305.94	-1.20365	-0.328579	-0.247304	0.115757
171.22	7122.28	283.6	-1.22415	-0.32653	-0.267014	0.0808888
172.22	7146.28	265.14	-1.18197	-0.33034	-0.225369	0.154559
173.22	7170.5	253.57	-1.21483	-0.334597	-0.171229	0.250334
174.22	7195.5	248.39	-1.21483	-0.333894	-0.196048	0.206429
175.22	7218.3	245.58	-1.22365	-0.336759	-0.134685	0.314981
178.44	7269.04	220.02	-1.09882	-0.335531	-0.225153	0.154942
179.44	7285.04	217.94	-1.17985	-0.334633	-0.193428	0.211063
180.44	7298.84	211.24	-1.19571	-0.335996	-0.190898	0.215539
181.44	7310.28	196.28	-1.12856	-0.327818	-0.246578	0.117041
182.44	7322.72	184.6	-1.20085	-0.326183	-0.266056	0.0825842
183.44	7335.72	176.58	-1.18875	-0.327816	-0.254092	0.103749
184.44	7349.16	173.06	-1.17187	-0.328	-0.263257	0.0875346
185.44	7359.2	172.28	-1.1559	-0.329945	-0.279087	0.0595315
186.44	7363.76	171.78	-1.14664	-0.337245	-0.213832	0.174969
187.44	7368.2	171.06	-1.09508	-0.334478	-0.184189	0.227408
188.44	7372.76	170.72	-1.02669	-0.330694	-0.251022	0.109178
189.44	7377.2	171.22	-1.09848	-0.33577	-0.256336	0.0997782
190.44	7382.2	171.06	-1.04536	-0.338472	-0.22374	0.157441
191.44	7387.2	170.28	-1.02538	-0.334428	-0.297479	0.0269956
192.44	7392.64	170.22	-1.04354	-0.338403	-0.231105	0.144413
193.44	7398.2	170.72	-1.00329	-0.343687	-0.162969	0.264946
194.44	7403.2	171.44	-0.965125	-0.350256	-0.0997772	0.376733
195.44	7408.64	172.22	-1.04065	-0.350325	-0.148073	0.291297
196.44	7414.64	172.5	-1.01949	-0.352563	-0.110468	0.357821
197.44	7420.2	172.94	-0.837355	-0.350015	-0.139877	0.305796
198.44	7425.64	173.94	-0.916176	-0.351202	-0.0685364	0.431998
199.44	7431.2	174.72	-1.01577	-0.35929	-0.082688	0.406964
200.44	7436.64	175	-1.00764	-0.346628	-0.114263	0.351108
201.44	7442.2	174.78	-0.962268	-0.354424	-0.0775856	0.41599
202.44	7447.64	174.94	-0.922134	-0.346031	-0.0934304	0.38796
203.44	7453.2	175.94	-1.01488	-0.348239	-0.109523	0.359492
204.44	7458.64	176.94	-1.07318	-0.354233	-0.0199258	0.517991
205.44	7464.2	177.72	-0.983891	-0.355544	-0.086132	0.400871
206.44	7469.2	177.78	-0.952408	-0.351947	-0.0877362	0.398034
207.44	7474.64	177.94	-0.950125	-0.359053	-0.000947366	0.551564
208.44	7480.2	178.72	-1.06564	-0.348695	-0.104786	0.367872
209.44	7485.64	179.66	-1.04122	-0.352823	-0.0688517	0.43144
210.44	7491.2	180.28	-1.06546	-0.346815	-0.0630492	0.441705
211.44	7496.64	180.44	-0.997632	-0.348318	-0.0174837	0.522311
212.44	7502.2	180.78	-1.04725	-0.347605	0.00463073	0.561432
213.44	7507.64	180.5	-1.09344	-0.350597	0.0323338	0.610439
214.44	7513.64	181.16	-1.12446	-0.356822	0.00327811	0.559039
215.44	7519.2	181.78	-1.12903	-0.352586	0.00556087	0.563077
216.44	7524.64	181.5	-0.99823	-0.35087	0.0267153	0.600499
217.44	7530.64	181.5	-0.962226	-0.346603	-0.106436	0.364954
218.44	7536.2	182.16	-0.942337	-0.347189	-0.010365	0.534904
219.44	7541.64	183.88	-0.981327	-0.345541	-0.116802	0.346616
220.44	7547.2	184.56	-1.12334	-0.353157	-0.0230029	0.512548
221.44	7552.64	184	-1.07608	-0.351103	0.00405237	0.560409
222.44	7558.2	183.78	-0.980019	-0.35191	-0.0139103	0.528632
223.44	7563.2	183.72	-1.06627	-0.353114	-0.0121627	0.531724
224.44	7568.64	184	-1.06826	-0.358798	-0.00265269	0.548547
225.44	7574.2	184	-1.08513	-0.347879	-0.0487225	0.467049
226.44	7579.64	184	-1.08114	-0.354125	-0.00820578	0.538724
227.44	7585.2	184.44	-1.05623	-0.358331	0.0347337	0.614684
228.44	7590.64	185	-0.999339	-0.354354	-0.0174688	0.522337
229.44	7596.2	185.66	-0.893418	-0.353857	0.0143888	0.578694
230.44	7601.64	186.28	-1.05588	-0.350212	0.00411431	0.560518
231.44	7607.64	186	-1.15594	-0.35376	0.0193773	0.587519
232.44	7613.2	186	-1.11088	-0.352685	-0.0326584	0.495467
233.44	7618.64	186.66	-0.974767	-0.352136	-0.0231973	0.512204
234.44	7624.64	187.94	-0.922965	-0.358128	0.0410314	0.625825
235.44	7630.64	188.28	-1.03558	-0.34725	-0.0374369	0.487014
236.44	7636.2	187.78	-1.12338	-0.354258	-0.0205947	0.516808
237.44	7641.64	187.72	-1.01863	-0.34229	-0.0527286	0.459962
238.44	7647.2	188.22	-1.12251	-0.344081	0.0285891	0.603814
239.44	7652.2	188.94	-1.15615	-0.352712	0.0380099	0.62048
240.44	7657.64	189.28	-1.18495	-0.345309	-0.0169728	0.523215
241.44	7663.2	189	-1.20468	-0.343242	-0.0230215	0.512514
242.44	7668.2	188.56	-1.19123	-0.343407	0.0192148	0.587231
243.44	7673.64	188.44	-1.10207	-0.344047	-0.00449487	0.545288
244.44	7679.2	189.22	-1.22383	-0.342524	0.0110435	0.572776
245.44	7684.64	189.28	-1.17128	-0.34239	0.00802934	0.567444
246.44	7690.2	189	-1.24953	-0.344935	0.0608259	0.660841
247.44	7695.64	189.22	-1.24612	-0.341317	0.0550985	0.65071
248.44	7701.64	190.16	-1.26183	-0.336503	0.021929	0.592033
249.44	7707.2	191.44	-1.2551	-0.335804	0.0441284	0.631303
250.44	7712.64	191.78	-1.17875	-0.337862	0.0557381	0.651841
251.44	7718.64	191.72	-1.05567	-0.337175	0.0561502	0.65257
252.44	7724.2	191.78	-1.25343	-0.344098	0.074119	0.684357
253.44	7729.64	191.72	-1.26083	-0.344636	0.0865971	0.706431
254.44	7735.2	192.88	-1.2688	-0.339315	0.0605571	0.660366
255.44	7740.2	193.78	-1.29478	-0.343606	0.0804439	0.695546
256.44	7745.64	193.28	-1.29222	-0.345765	0.0678224	0.673218
257.44	7751.2	193.44	-1.28308	-0.35004	0.0731776	0.682692
258.44	7756.64	194.22	-1.27606	-0.34655	0.0792503	0.693434
259.44	7762.2	194.72	-1.27397	-0.348544	0.0646561	0.667617
260.44	7767.2	194.78	-1.25297	-0.345206	0.0585879	0.656882
261.44	7772.64	194.5	-1.27675	-0.34477	0.0488599	0.639673
262.44	7778.64	194.28	-1.28016	-0.344141	0.0458008	0.634262
263.44	7784.2	194.44	-1.27651	-0.343142	0.0377255	0.619977
264.44	7789.64	195	-1.26758	-0.345342	0.0344424	0.614169
265.44	7795.64	194.78	-1.29532	-0.335599	-0.019778	0.518252
266.44	7801.2	194.28	-1.29255	-0.333729	-0.0437606	0.475827
267.44	7806.64	194	-1.27076	-0.327784	-0.0781036	0.415074
268.44	7812.64	194	-1.28114	-0.321918	-0.130136	0.323028
269.44	7814.7	195.567	-1.30608	-0.314793	-0.172198	0.248619
270.44	7819.7	197.233	-1.27376	-0.304416	-0.226907	0.151839
271.44	7824.7	198.9	-1.29663	-0.306273	-0.205555	0.189612
272.44	7829.7	200.567	-1.27831	-0.315747	-0.173608	0.246125
273.44	7834.7	202.233	-1.29281	-0.313965	-0.186838	0.222722
274.44	7839.7	203.9	-1.27649	-0.316168	-0.16372	0.263617
275.44	7844.7	205.567	-1.21582	-0.321613	-0.155955	0.277354
276.44	7849.7	207.233	-1.22103	-0.323185	-0.108158	0.361908
280.36	7869.3	213.767	-1.03879	-0.373931	-0.0455632	0.472638
281.36	7874.3	215.433	-1.02137	-0.345101	-0.120889	0.339386
282.36	7879.3	217.1	-1.00121	-0.340461	-0.127065	0.328461
283.36	7884.3	218.767	-1.02137	-0.352876	-0.0214953	0.515214
284.36	7889.3	220.433	-1.0058	-0.362037	-0.0118172	0.532335
285.36	7894.3	222.1	-0.774026	-0.358233	-0.0218753	0.514542
286.36	7899.3	223.767	-0.923653	-0.356108	-0.0573595	0.45177
287.36	7904.3	225.433	-1.04978	-0.354474	-0.0547264	0.456428
288.36	7909.3	227.1	-1.00662	-0.351695	-0.0913377	0.391663
289.36	7914.3	228.767	-1.01801	-0.341001	-0.147059	0.293092
290.36	7919.3	230.433	-1.04989	-0.34059	-0.233411	0.140334
291.36	7924.3	232.1	-0.995474	-0.355762	-0.111382	0.356204
292.36	7929.3	233.767	-0.994248	-0.353129	-0.138531	0.308178
293.36	7934.3	235.433	-1.01528	-0.359014	-0.00765787	0.539693
294.36	7939.3	237.1	-1.02239	-0.360352	-0.00437345	0.545503
295.36	7944.3	238.767	-0.979421	-0.363914	0.125486	0.775226
296.36	7949.3	240.433	-1.01529	-0.365789	0.0472475	0.636821
297.36	7954.3	242.1	-1.00255	-0.373285	0.127852	0.779412
298.36	7959.3	243.767	-1.02423	-0.366835	0.0782486	0.691662
299.36	7964.3	245.433	-1.00563	-0.371931	0.0626615	0.664089
300.36	7969.3	247.1	-0.972281	-0.363669	0.0310303	0.608133
301.36	7974.3	248.767	-0.975531	-0.364627	0.113395	0.753836
302.36	7979.3	250.433	-0.985612	-0.357275	-0.0453581	0.473001
303.36	7984.3	252.1	-0.970989	-0.360664	-0.207955	0.185365
304.36	7989.3	253.767	-0.974992	-0.370918	0.11408	0.755049
305.36	7994.3	255.433	-0.969868	-0.371863	0.124899	0.774188
306.36	7999.3	257.1	-1.00627	-0.376105	0.190558	0.890339
307.36	8004.3	258.767	-0.997572	-0.376323	0.193575	0.895677
308.36	8009.3	260.433	-1.02034	-0.3796	0.221278	0.944682
309.36	8014.3	262.1	-0.978061	-0.375263	0.163104	0.841773
310.36	8019.3	263.767	-0.916802	-0.379267	0.181147	0.873691
311.36	8024.3	265.433	-0.951431	-0.376354	0.0403848	0.624681
312.36	8029.3	267.1	-0.981335	-0.381773	0.114798	0.756318
313.36	8034.3	268.767	-1.03167	-0.379259	0.0914752	0.71506
314.36	8039.3	270.433	-1.04782	-0.371172	0.00532097	0.562653
315.36	8044.3	272.1	-1.06485	-0.376046	0.0826885	0.699517
316.36	8049.3	273.767	-1.0362	-0.385539	0.161111	0.838246
317.36	8054.3	275.433	-1.01818	-0.384389	0.124342	0.773202
318.36	8059.3	277.1	-1.0036	-0.374	0.00068937	0.554459
319.36	8064.3	278.767	-0.922885	-0.384511	0.129129	0.781671
320.36	8069.3	280.433	-0.991434	-0.39105	0.132764	0.7881
321.36	8074.3	282.1	-0.995315	-0.388358	0.146912	0.813129
322.36	8079.3	283.767	-1.03652	-0.388798	0.107011	0.742543
323.36	8084.3	285.433	-1.03226	-0.38989	0.0680021	0.673536
324.36	8089.3	287.1	-0.998	-0.384357	0.0605133	0.660288
325.36	8094.3	288.767	-0.871114	-0.371411	0.138787	0.798755
326.36	8099.3	290.433	-1.04003	-0.382932	0.108713	0.745555
327.36	8104.3	292.1	-0.972368	-0.38477	0.128412	0.780403
328.36	8109.3	293.767	-1.0182	-0.390611	0.130722	0.784488
329.36	8114.3	295.433	-0.945756	-0.395135	0.218281	0.939381
330.36	8119.3	297.1	-0.932738	-0.378286	0.0954978	0.722176
331.36	8124.3	298.767	-0.971129	-0.38256	0.079584	0.694025
332.36	8129.3	300.433	-0.969567	-0.383965	0.159485	0.83537
333.36	8134.3	302.1	-0.958048	-0.38157	0.0967253	0.724348
334.36	8139.3	303.767	-1.05303	-0.371946	-0.00415411	0.545891
335.36	8144.3	305.433	-0.987002	-0.383805	0.16134	0.838652
336.36	8149.3	307.1	-1.02024	-0.390438	0.172587	0.858549
337.36	8154.3	308.767	-0.969656	-0.389924	0.195847	0.899696
338.36	8159.3	310.433	-1.02172	-0.389272	0.173837	0.86076
339.36	8164.3	312.1	-1.03043	-0.383607	0.0668996	0.671586
340.36	8169.3	313.767	-0.941318	-0.394143	0.124484	0.773453
341.36	8174.3	315.433	-0.960603	-0.404455	0.172489	0.858375
342.36	8179.3	317.1	-0.879098	-0.381661	0.186487	0.883138
343.36	8184.3	318.767	-0.995186	-0.387821	0.241227	0.979972
344.36	8189.3	320.433	-1.03526	-0.382703	0.163118	0.841796
345.36	8194.3	322.1	-1.04963	-0.379277	0.161448	0.838843
346.36	8199.3	323.767	-1.03232	-0.38457	0.158015	0.832771
347.36	8204.3	325.433	-0.999635	-0.393504	0.165343	0.845733
348.36	8209.3	327.1	-0.93776	-0.388411	0.149101	0.817001
349.36	8214.3	328.767	-1.03467	-0.389477	0.132188	0.787081
350.36	8219.3	330.433	-1.00266	-0.377593	0.110183	0.748155
351.36	8224.3	332.1	-1.01806	-0.386852	0.202185	0.910907
352.36	8229.3	333.767	-0.818037	-0.385796	0.216769	0.936706
353.36	8234.3	335.433	-0.952807	-0.396507	0.198763	0.904854
354.36	8239.3	337.1	-1.02096	-0.391451	0.178666	0.869302
355.36	8244.3	338.767	-0.96649	-0.381382	0.183422	0.877715
356.36	8249.3	340.433	-1.01588	-0.38676	0.231397	0.962583
357.36	8254.3	342.1	-0.964752	-0.381584	0.192914	0.894506
358.36	8259.3	343.767	-1.04148	-0.377316	0.1813	0.873962
359.36	8264.3	345.433	-1.08433	-0.375358	0.189552	0.88856
360.36	8269.3	347.1	-1.05003	-0.37931	0.178409	0.868848
361.36	8274.3	348.767	-0.982045	-0.372994	0.080968	0.696473
362.36	8279.3	350.433	-1.04708	-0.368392	0.0921346	0.716227
363.36	8284.3	352.1	-1.00498	-0.370838	0.104345	0.737827
364.36	8289.3	353.767	-1.0412	-0.365942	0.0459204	0.634473
365.36	8294.3	355.433	-1.08339	-0.368128	0.0729866	0.682354
366.36	8299.3	357.1	-1.0432	-0.362529	0.0293127	0.605094
367.36	8304.3	358.767	-0.969674	-0.36858	0.0665454	0.670959
368.36	8309.3	360.433	-0.971129	-0.374679	0.109055	0.746159
369.36	8314.3	362.1	-1.00188	-0.379916	0.0316959	0.60931
370.36	8319.3	363.767	-1.02575	-0.371286	0.0136646	0.577413
371.36	8324.3	365.433	-1.01973	-0.367747	0.0329228	0.611481
372.36	8329.3	367.1	-0.991552	-0.372716	0.0506344	0.642813
373.36	8334.3	368.767	-1.02519	-0.376548	0.0903664	0.713099
374.36	8339.3	370.433	-0.957533	-0.373668	0.126423	0.776883
375.36	8344.3	372.1	-0.929592	-0.378724	0.191253	0.891568
376.36	8349.3	373.767	-0.954865	-0.368923	0.0797284	0.69428
377.36	8354.3	375.433	-0.897982	-0.355511	-0.101674	0.373378
378.36	8359.3	377.1	-0.931039	-0.374467	0.0963155	0.723623
380.98	8372.4	381.467	-0.89055	-0.35938	0.0956247	0.722401
381.98	8377.4	383.133	-0.828272	-0.337871	-0.280586	0.0568811
382.98	8382.4	384.8	-0.819276	-0.328236	-0.311247	0.00264148
383.98	8387.4	386.467	-0.819173	-0.365749	0.0677451	0.673082
384.98	8392.4	388.133	-0.815164	-0.363784	0.117526	0.761145
385.98	8397.4	389.8	-0.969801	-0.368475	0.119026	0.763798
386.98	8402.4	391.467	-0.85751	-0.368129	0.168146	0.850691
387.98	8407.4	393.133	-0.951205	-0.372436	0.146036	0.811579
388.98	8412.4	394.8	-0.923511	-0.373912	0.205857	0.917402
389.98	8417.4	396.467	-0.863863	-0.365015	0.126811	0.77757
390.98	8422.4	398.133	-0.952128	-0.369583	0.142437	0.805212
391.98	8427.4	399.8	-0.813396	-0.356077	0.120515	0.766432
392.98	8432.4	401.467	-0.920053	-0.362172	0.0633814	0.665362
393.98	8437.4	403.133	-1.01527	-0.364634	0.175117	0.863023
394.98	8442.4	404.8	-0.99042	-0.363146	0.143518	0.807124
395.98	8447.4	406.467	-0.974551	-0.370224	0.134123	0.790504
396.98	8452.4	408.133	-0.933002	-0.371455	0.175948	0.864494
397.98	8457.4	409.8	-0.789723	-0.362092	0.135999	0.793824
398.98	8462.4	411.467	-0.882137	-0.364653	0.118701	0.763222
399.98	8467.4	413.133	-0.959991	-0.361279	0.0760205	0.687721
400.98	8472.4	414.8	-0.950946	-0.357245	0.00410935	0.560509
401.98	8477.4	416.467	-0.958348	-0.359691	-0.0643035	0.439486
402.98	8482.4	418.133	-0.969584	-0.332047	-0.480884	-0.29745
403.98	8487.4	419.8	-1.00122	-0.344976	-0.312406	0.000589983
404.98	8492.4	421.467	-0.987782	-0.365325	-0.0101805	0.53523
405.98	8497.4	423.133	-0.959633	-0.362987	0.0292694	0.605018
406.98	8502.4	424.8	-1.01258	-0.371662	0.0855993	0.704666
407.98	8507.4	426.467	-0.965672	-0.377311	0.0717268	0.680125
408.98	8512.4	428.133	-0.889432	-0.396284	0.0415455	0.626734
409.98	8517.4	429.8	-0.952781	-0.374043	0.0475295	0.63732
410.98	8522.4	431.467	-1.01016	-0.36666	0.0360636	0.617037
411.98	8527.4	433.133	-0.937978	-0.370358	0.0993564	0.729002
412.98	8532.4	434.8	-0.981833	-0.365728	-0.0543284	0.457132
413.98	8537.4	436.467	-0.8923	-0.328294	-0.49938	-0.330168
414.98	8542.4	438.133	-0.939223	-0.376285	0.0964653	0.723888
415.98	8547.4	439.8	-0.931975	-0.368361	0.120114	0.765722
416.98	8552.4	441.467	-1.03918	-0.370884	0.124252	0.773042
417.98	8557.4	443.133	-1.02174	-0.373337	0.138986	0.799108
418.98	8562.4	444.8	-0.93133	-0.368032	0.140592	0.801949
419.98	8567.4	446.467	-1.00161	-0.366691	0.180834	0.873137
420.98	8572.4	448.133	-0.791849	-0.372215	0.133763	0.789868
421.98	8577.4	449.8	-0.909102	-0.365529	-0.0179683	0.521454
422.98	8582.4	451.467	-0.90806	-0.372857	0.0170767	0.583449
423.98	8587.4	453.133	-1.00293	-0.377914	0.101266	0.73238
424.98	8592.4	454.8	-1.02106	-0.370771	0.0163391	0.582144
425.98	8597.4	456.467	-0.952023	-0.369686	0.0683826	0.674209
426.98	8602.4	458.133	-0.852913	-0.37387	0.12378	0.772207
427.98	8607.4	459.8	-0.958887	-0.376372	0.133367	0.789167
428.98	8612.4	461.467	-0.925181	-0.380872	0.125262	0.77483
429.98	8617.4	463.133	-1.00826	-0.3808	0.0791385	0.693237
430.98	8622.4	464.8	-0.991454	-0.374504	0.0493168	0.640482
431.98	8627.4	466.467	-1.01722	-0.375754	0.0167824	0.582928
432.98	8632.4	468.133	-0.957884	-0.379288	0.00166189	0.55618
433.98	8637.4	469.8	-1.01856	-0.357126	-0.435754	-0.217613
434.98	8642.4	471.467	-0.998646	-0.364081	0.114044	0.754984
435.98	8647.4	473.133	-0.981443	-0.354108	0.0698888	0.676874
436.98	8652.4	474.8	-0.954058	-0.38924	0.105087	0.739141
437.98	8657.4	476.467	-0.868249	-0.385662	0.108417	0.74503
438.98	8662.4	478.133	-0.913571	-0.378094	0.0441904	0.631413
439.98	8667.4	479.8	-0.996778	-0.379079	0.0724164	0.681345
440.98	8672.4	481.467	-0.823877	-0.380836	0.0840979	0.70201
441.98	8677.4	483.133	-0.850898	-0.386633	0.0329766	0.611576
442.98	8682.4	484.8	-1.02735	-0.386844	0.162453	0.840621
443.98	8687.4	486.467	-0.991947	-0.362869	0.0111273	0.572924
444.98	8692.4	488.133	-0.913888	-0.381962	0.147488	0.814148
445.98	8697.4	489.8	-0.890408	-0.379451	0.111926	0.751237
446.98	8702.4	491.467	-0.927107	-0.381569	0.161196	0.838397
447.98	8707.4	493.133	-0.971226	-0.386167	0.163674	0.842781
448.98	8712.4	494.8	-0.894327	-0.383072	0.129329	0.782024
449.98	8717.4	496.467	-0.933339	-0.381581	0.115547	0.757643
450.98	8722.4	498.133	-0.968125	-0.371514	0.0333203	0.612184
451.98	8727.4	499.8	-0.990656	-0.384987	0.0385921	0.62151
452.98	8732.4	501.467	-0.94655	-0.367667	-0.110551	0.357675
453.98	8737.4	503.133	-0.869214	-0.379958	0.135845	0.793551
454.98	8742.4	504.8	-1.03056	-0.392451	0.185756	0.881845
455.98	8747.4	506.467	-0.992613	-0.3798	0.217528	0.93805
456.98	8752.4	508.133	-0.964383	-0.375878	0.1885	0.886698
457.98	8757.4	509.8	-0.974406	-0.373064	0.123704	0.772073
458.98	8762.4	511.467	-0.92916	-0.378919	0.0578749	0.655621
459.98	8767.4	513.133	-0.979049	-0.366221	0.0120901	0.574627
460.98	8772.4	514.8	-0.913205	-0.369769	0.0821323	0.698533
461.98	8777.4	516.467	-0.901302	-0.388151	0.135153	0.792327
462.98	8782.4	518.133	-0.992039	-0.387521	0.132733	0.788046
463.98	8787.4	519.8	-0.866221	-0.385472	0.11344	0.753916
464.98	8792.4	521.467	-0.982027	-0.388761	0.129193	0.781784
465.98	8797.4	523.133	-1.02969	-0.380484	0.11255	0.752341
466.98	8802.4	524.8	-0.902631	-0.373315	0.0129452	0.57614
467.98	8807.4	526.467	-0.989313	-0.361819	-0.164715	0.261857
468.98	8812.4	528.133	-0.911386	-0.322078	-0.734044	-0.745291
469.98	8817.4	529.8	-0.971631	-0.348219	-0.364545	-0.0916449
470.98	8822.4	531.467	-0.930615	-0.372558	0.125684	0.775576
471.98	8827.4	533.133	-0.947427	-0.37729	0.148346	0.815665
472.98	8832.4	534.8	-1.03521	-0.376088	0.131984	0.786721
473.98	8837.4	536.467	-0.992373	-0.377089	0.1568	0.83062
474.98	8842.4	538.133	-0.940049	-0.369962	0.113748	0.754461
475.98	8847.4	539.8	-0.824158	-0.352392	0.0669497	0.671675
476.98	8852.4	541.467	-0.973202	-0.36611	0.141575	0.803688
477.98	8857.4	543.133	-0.856662	-0.363319	0.126473	0.776972
478.98	8862.4	544.8	-0.939878	-0.350929	0.0623913	0.663611
479.98	8867.4	546.467	-0.983291	-0.364979	0.172898	0.859099
484.94	8892.2	554.733	-0.978848	-0.372207	0.223606	0.948801
485.94	8897.2	556.4	-1.01509	-0.276389	-0.86442	-0.975927
486.94	8902.2	558.067	-1.07292	-0.380714	0.16559	0.846171
487.94	8907.2	559.733	-0.981485	-0.366707	0.23224	0.964074
488.94	8912.2	561.4	-0.94582	-0.374302	0.245063	0.986758
489.94	8917.2	563.067	-1.05499	-0.365623	-0.0238599	0.511031
490.94	8922.2	564.733	-0.953397	-0.364238	0.128515	0.780585
491.94	8927.2	566.4	-1.04948	-0.37935	-0.0760172	0.418765
492.94	8932.2	568.067	-1.05711	-0.390091	-0.00487785	0.544611
493.94	8937.2	569.733	-1.01449	-0.365953	-0.0499475	0.464882
494.94	8942.2	571.4	-0.968851	-0.351079	-0.191262	0.214895
495.94	8947.2	573.067	-0.996662	-0.374283	0.00536996	0.562739
496.94	8952.2	574.733	-1.07023	-0.371215	-0.0308219	0.498716
497.94	8957.2	576.4	-1.02068	-0.373498	0.0794279	0.693749
498.94	8962.2	578.067	-1.06969	-0.36383	0.0407324	0.625296
499.94	8967.2	579.733	-1.08267	-0.362959	0.000661763	0.55441
500.94	8972.2	581.4	-1.05821	-0.327905	-0.546522	-0.413563
501.94	8977.2	583.067	-1.07712	-0.358609	0.0541948	0.649111
502.94	8982.2	584.733	-0.859416	-0.374772	0.114912	0.75652
503.94	8987.2	586.4	-1.01053	-0.366114	0.0923087	0.716535
504.94	8992.2	588.067	-0.93044	-0.375953	0.0359481	0.616832
505.94	8997.2	589.733	-1.04864	-0.395314	-0.110231	0.358239
506.94	9002.2	591.4	-1.06845	-0.377795	-0.0424062	0.478223
507.94	9007.2	593.067	-1.03128	-0.37096	-0.0212543	0.515641
508.94	9012.2	594.733	-1.05069	-0.373486	0.0541326	0.649001
509.94	9017.2	596.4	-1.09948	-0.382616	0.0600368	0.659446
510.94	9022.2	598.067	-1.03114	-0.353307	-0.157131	0.275273
511.94	9027.2	599.733	-0.964284	-0.371874	-0.0191937	0.519286
512.94	9032.2	601.4	-1.07304	-0.375574	0.0204639	0.589441
513.94	9037.2	603.067	-1.01498	-0.37251	0.0611148	0.661353
514.94	9042.2	604.733	-1.06113	-0.36499	-0.016158	0.524656
515.94	9047.2	606.4	-1.12052	-0.350066	-0.500445	-0.332053
516.94	9052.2	608.067	-0.893185	-0.312009	-0.940624	-1.11073
517.94	9057.2	609.733	-1.10177	-0.374758	0.12163	0.768405
518.94	9062.2	611.4	-1.05045	-0.358568	0.028969	0.604486
519.94	9067.2	613.067	-0.921518	-0.371195	0.0206779	0.589819
520.94	9072.2	614.733	-1.06707	-0.352558	0.0348136	0.614825
521.94	9077.2	616.4	-1.04997	-0.353352	-0.230756	0.14503
522.94	9082.2	618.067	-1.07777	-0.366003	-0.0358903	0.489749
523.94	9087.2	619.733	-1.05507	-0.370237	-0.0427155	0.477676
524.94	9092.2	621.4	-0.907174	-0.370483	-0.0100197	0.535515
525.94	9097.2	623.067	-1.04859	-0.379251	0.0994627	0.72919
526.94	9102.2	624.733	-0.861688	-0.361291	0.0630907	0.664848
527.94	9107.2	626.4	-1.01364	-0.365007	-0.0518922	0.461442
528.94	9112.2	628.067	-0.997638	-0.357512	0.0438496	0.63081
529.94	9117.2	629.733	-1.03977	-0.355288	-0.049398	0.465854
530.94	9122.2	631.4	-1.00825	-0.35694	0.0794921	0.693862
531.94	9127.2	633.067	-1.00616	-0.355116	0.111556	0.750584
532.94	9132.2	634.733	-1.02652	-0.358662	-0.0486412	0.467193
533.94	9137.2	636.4	-1.01939	-0.368695	0.0723206	0.681176
534.94	9142.2	638.067	-1.03298	-0.362563	0.0829528	0.699984
535.94	9147.2	639.733	-1.01729	-0.367323	0.0510401	0.64353
536.94	9152.2	641.4	-1.07285	-0.361132	0.0681671	0.673828
537.94	9157.2	643.067	-1.09305	-0.355053	0.0957975	0.722707

## Sheet: Metadata
Core name	PO362-2_73			Table S3
latitude	31.9867			column	name	unit	definition
longitude	30.1565			A	Core depth	cm	downcore depth of sample
Date/Time	2008-02-21T13:52:00			B	Age	yr BP	estimated age of the sample
elevation	-569.62			C	Error	yr	2-sigma uncertainty on age
Location	Mediterranean Sea			D	Log(S/Cl)		Log ratio of sulfur over chlorine
Campaign	POS362/2			E	Log(K/Ti)		Log ratio of potassium over titanium
Basis	Poseidon			F	Log(Ti/Ca)		Log ratio of titanium over calcium
Method/Device	Gravity Corer			G	Z-scored Log(Ti/Ca)		Z-scored Log ratio of titanium over calcium
