# Supplementary material for: Deoxygenation dynamics on the western Nile deep-sea fan during sapropel S1 from seasonal to millennial timescales
Source: Copernicus journal article supplement (doi:10.5194/cp-17-1025-2021), 2021-05-12
Supplement: Supplementary file 4 [file Suppl_Table_S4.xls]

## Sheet: Read me
Blanchet, Cécile L; Tjallingii, Rik; Schleicher, Anja; Schouten, Stefan; Frank, Martin; Brauer, Achim (2020): XRF elemental contents, oxygen and carbon isotopes and biomarkers of sediment core POS362-2_33.
In supplement of
Deoxygenation dynamics on the western Nile deep-sea fan during sapropel S1 from seasonal to millenial time-scales
Blanchet et al.

## Sheet: d18O-d13C-Tab S4
Label	Core depth (cm)	Age (yr BP)	d13C (permil vs PDB)	d13C av. (permil vs PDB)	sd (permil vs PDB)	d18O (permil vs PDB)	d18O av. (permil vs PDB)	sd (permil vs PDB)
Core top
Foraminifera
G. ruber			1.383			-0.074
Benthic			1.25			1.6
Equilibrium calcite
G. ruber						-0.21
planktonic inorganic calcite						-0.12
benthic foraminifera						1.77
benthic inorganic calcite						1.71
S1 sapropel
Foraminifera
G. ruber (average)			0.295			-1.17
Benthic (average)			0.15			1.8
F_321	321	8828.5	-0.082			-1.79
F_342	342	8879.5	-0.178			-1.101
F_390	390	9020	-1.356			-0.577
F_427	427	9150	-0.014			-1.079
F_442	442	9204.5	-0.426			-1.38
F_551	551	9634.17	0.221			-2.101
Carbonates
C_322	322	8825.5	-12.884			1.321
C_340	340	8879.5	-11.055	-11.788	1.03662	0.46	0.607	0.207889
C_341	341	8879.5	-12.521			0.754
C_390	390	9020	-13.762	-13.8945	0.187383	1.556	1.7635	0.293449
C_390.5	390.5	9020	-14.027			1.971
C_427_1	427	9150	-14.527	-14.5305	0.00494975	2.487	2.3655	0.171827
C_427_2	427	9150	-14.534			2.244
C_443	443	9200	-7.53			-1.417
C_551	551	9612.5	-4.277			-2.312
Equilibrium calcite
planktonic inorganic calcite						-1.23

## Sheet: metadata
Core name	PO362-2_33					Table S4
latitude	31.6932					column	Label	unit	definition
longitude	29.7508					A	Core depth (cm)	cm	downcore depth of sample
Date/Time	2008-02-16T17:52:00					B	Age (yr BP)	yr BP	estimated age of the sample
elevation	-738.439					C	d13C	permil vs PDB	stable carbon isotopes
Location	Mediterranean Sea					D	d13C av.	permil vs PDB	average of duplicate measurements of stable carbon isotopes
Campaign	POS362/2	http://oceanrep.geomar.de/1351/				E	sd	permil vs PDB	standard deviation
Basis	Poseidon					F	d18O	permil vs PDB	stable oxygen isotopes
Method/Device	Gravity Corer					G	d18O av.	permil vs PDB	average of duplicate measurements of stable oxygen isotopes
						H	sd	permil vs PDB	standard deviation
