# Supplementary material for: Deoxygenation dynamics on the western Nile deep-sea fan during sapropel S1 from seasonal to millennial timescales
Source: Copernicus journal article supplement (doi:10.5194/cp-17-1025-2021), 2021-05-12
Supplement: Supplementary file 5 [file Suppl_Table_S5.xls]

## Sheet: Read me
Blanchet, Cécile L; Tjallingii, Rik; Schleicher, Anja; Schouten, Stefan; Frank, Martin; Brauer, Achim (2020): XRF elemental contents, oxygen and carbon isotopes and biomarkers of sediment core POS362-2_33.
In supplement of
Deoxygenation dynamics on the western Nile deep-sea fan during sapropel S1 from seasonal to millenial time-scales
Blanchet et al.

## Sheet: biomarkers-Tab S5
Core depth (cm)	Age (yr BP)	error (2s)	WBD (g/cm3)	LSR (cm/ka)	weight sediment (g)	Weight C37 (µg)	Conc. C37 (µg/g)	MAR C37 (µg/cm2.a)	weight sediment (g)	weight odd n-alkanes (µg)	weight lycopane (µg)	weight triterpenoids (µg)	conc odd n-alkanes (µg/g)	conc lycopane (µg/g)	conc triterpenoids (µg/g)	MAR odd n-alkanes (µg/cm2.a)	MAR lycopane (µg/cm2.a)	MAR triterpenoids (µg/cm2.a)	CPI	weight sediment (g)	Weight cren (µg)	sd	Weight brGDGTs (µg)	sd	Conc cren (µg/g)	sd	Conc brGDGTs (µg/g)	sd	MAR Cren (µg/cm2.a)	sd	MAR brGDGTs (µg/cm2.a)	sd
0	161	210	1.3	9.13242	5.53	0.0459516	0.00830951	9.86518e-05	5.53	36.3729	0.188775	2.83338	6.57738	0.0341364	0.512366	0.0780876	0.000405273	0.00608289	7.29598	5.53	2.30689	0.00817901	1.35985	0.0484259	0.417158	0.00147903	0.245904	0.00875694	0.00495256	1.75592e-05	0.00291941	0.000103964
10	1256	948.5	1.37	9.13242	1.88	0.0783456	0.0416732	0.000521391	1.88	13.9701	0.0707025	1.39574	7.43091	0.0376077	0.742414	0.0929711	0.000470525	0.00928865	5.31002	7.64	2.70353	0.0880615	1.2082	0.00732602	0.353865	0.0115264	0.158142	0.000958903	0.00442735	0.000144211	0.00197858	1.19972e-05
15	1927	1036	1.4	7.45156	5.51	0.187122	0.0339605	0.000354282	5.51	33.5317	0.10511	4.95292	6.0856	0.0190762	0.898897	0.0634861	0.000199007	0.00937747	9.0007	5.51	2.03035	0.0147997	1.29696	0.0595752	0.368485	0.00268597	0.235382	0.0108122	0.0038441	2.80206e-05	0.00245555	0.000112795
25	3220.5	777.25	1.47	7.73096	4.63	0.0546915	0.0118124	0.000134242	4.63	16.2032	0.172263	0.862865	3.49962	0.0372057	0.186364	0.0397715	0.000422825	0.00211793	8.22393	8.59	1.7088	0.402022	0.923686	0.148724	0.198929	0.0114124	0.10753	0.0210061	0.00226073	0.000129696	0.00122203	0.000238724
30	3837	182	1.46	8.1103	6.1	0.186272	0.0305363	0.000361582	6.1	18.8593	0.119557	1.40579	3.09168	0.0195994	0.230457	0.0366088	0.000232078	0.00272885	7.71466	6.1	0.951426	0.0154857	0.636861	0.0948927	0.155972	0.00253863	0.104403	0.0155562	0.00184686	3.00601e-05	0.00123625	0.000184201
50	6141.5	147.5	1.33	8.67867	3.47	0.12345	0.0355764	0.000410645	3.47	10.4289	0.0709084	1.23682	3.00545	0.0204347	0.356432	0.0346908	0.00023587	0.00411416	5.52378	8.7	4.76752	0.241475	1.50802	0.0171661	0.547991	0.0277558	0.173336	0.00197311	0.00632526	0.000320375	0.00200075	2.27749e-05
60	6616	332.75	1.24	21.0748	5.11	0.65683	0.128538	0.00335906	5.11	10.8358	0.126117	1.78063	2.12052	0.0246805	0.348459	0.0554149	0.000644971	0.00910621	8.98248	5.11	9.23451	0.153982	4.56948	0.288258	1.80715	0.0301335	0.894223	0.0564106	0.0472257	0.000787472	0.0233685	0.00147416
60	6616	332.75	1.24	21.0748					5.25	27.6502	0.284335	6.24151	5.2667	0.0541591	1.18886	0.137633	0.00141533	0.0310682	7.43263
70	7071	266	1.23	21.978	4.78	0.628592	0.131505	0.00355496	4.78	37.3794	0.975338	5.50888	7.81995	0.204046	1.15248	0.211396	0.00551596	0.0311551	3.00324	6.42	87.3843	0.955189	27.9482	1.36211	13.6113	0.148783	4.35331	0.212167	0.367953	0.00402205	0.117683	0.0057355
80	7376.5	208.5	1.12	32.7332	4.61	1.62232	0.351913	0.0129015	4.61	6.7303	0.867378	1.98972	1.45994	0.188151	0.43161	0.053523	0.00689786	0.0158233	6.58331	5.9	47.8916	6.70329	12.6612	0.562292	8.11723	1.13615	2.14597	0.0953037	0.297587	0.0416527	0.0786739	0.00349395
90	7599.5	223.5	1.12	44.843	5.37	11.8814	2.21256	0.111124	5.37	26.2727	1.90276	15.6143	4.8925	0.354331	2.9077	0.245722	0.017796	0.146037	5.66728	5.37	57.1168	51.9647	35.3859	31.9111	10.6363	9.67685	6.58956	5.94248	0.534199	0.486012	0.330955	0.298457
112	7918	153.5	1.18	69.0738	4.64	0.164886	0.0355358	0.00289642												4.64	26.4142	0.373409	11.711	0.526131	5.69271	0.080476	2.52393	0.11339	0.463996	0.00655936	0.205718	0.00924211
121	7974	153	1.22	160.714	3.6	0.0618375	0.0171771	0.00336793		9.63058	0.123331	0.957317							5.88741	5.1	19.3256	0.304365	15.9175	0.885135	3.78933	0.0596795	3.12108	0.173556	0.74298	0.0117014	0.611954	0.0340293
130	8030	146.25	1.18	160.714	5.28	1.07919	0.204392	0.0387615	5.28	31.9193	0.375876	16.9314	6.04532	0.0711887	3.20671	1.14645	0.0135004	0.60813	7.17396	5.28	41.7368	0.521026	28.9704	1.3203	7.9047	0.0986792	5.48682	0.250056	1.49907	0.0187138	1.04054	0.0474214
139	8086.5	140.75	1.22	159.292	5.41	0.45973	0.0849779	0.0165143	5.41	33.8862	0.604124	21.0153	6.26363	0.111668	3.88452	1.21725	0.0217011	0.754904	6.27866	5.41	33.8712	0.509943	35.8975	1.53251	6.26085	0.0942592	6.63539	0.283274	1.21671	0.018318	1.2895	0.0550505
148	8141	132	1.22	165.138	1.52	0.0670988	0.0441439	0.00889358	1.52	6.15443	1.03603	1.92302	4.04897	0.681599	1.26514	0.815737	0.13732	0.254886	3.99724	5.13	44.3222	0.0157135	27.3933	1.20365	8.63981	0.00306306	5.33983	0.23463	1.74064	0.000617108	1.0758	0.0472704
160	8206.5	129	1.2	183.206	3.03	0.101373	0.0867718	0.0190765	0.81	8.17942	0.429515	3.07422	10.098	0.530265	3.79533	2.22003	0.116577	0.834393	5.42922	3.65	25.6575	10.6749	18.8779	8.31133	9.53525	5.99791	6.8399	4.02649	2.0963	1.31863	1.50373	0.885212
175	8283.5	127.25	1.21	194.805	5.24	0.704174	0.134384	0.0316763	5.24	34.3977	1.62726	21.184	6.56445	0.310546	4.04275	1.54733	0.0732001	0.952933	6.13871	5.24	48.6443	0.428603	42.4883	1.46801	9.28326	0.0817945	8.10845	0.280154	2.1882	0.0192801	1.91128	0.0660364
193	8373	122	1.22	201.117	5.28	0.525045	0.0994403	0.024399	5.28	42.5172	1.63261	20.7326	8.05251	0.309207	3.92663	1.97579	0.075868	0.96345	5.59036	5.28	55.0155	0.394053	44.0113	1.48974	10.4196	0.0746313	8.33547	0.282148	2.55659	0.0183118	2.04522	0.0692287
206	8431.5	121	1.14	222.222					0.57	5.49525	0.188761	1.54273	9.64079	0.33116	2.70654	2.44233	0.0838939	0.685657	3.04572	5.14	30.0257	1.04655	35.8662	0.167546	5.84158	0.20361	6.97786	0.0325965	1.47987	0.0515812	1.76773	0.00825779
215	8466	120	1.17	236.559	5.65	0.569393	0.100778	0.0278926	5.65	33.8583	1.50781	27.4622	5.99261	0.266868	4.86057	1.82905	0.0814529	1.48353	5.05405	5.65	36.9251	0.158286	43.1637	1.7545	6.53542	0.0280152	7.63959	0.310532	1.99472	0.00855073	2.33174	0.0947797
224	8502	118.75	1.16	250	2.87	0.109154	0.0380326	0.0110295	2.87	12.4613	0.39749	4.76532	4.34191	0.138498	1.66039	1.25915	0.0401645	0.481513	5.82529	4.5	22.3571	6.06574	18.0502	3.29176	5.02908	0.363815	4.16307	0.759431	1.45843	0.105506	1.20729	0.220235
233	8537	117.75	1.2	257.143	5.1	1.64706	0.322954	0.0996543	5.1	16.1963	1.05029	15.213	3.17575	0.205939	2.98295	0.979947	0.0635468	0.920453	7.84011	5.1	38.8425	0.192352	43.7112	1.90633	7.61617	0.0377161	8.57082	0.37379	2.35013	0.0116381	2.64471	0.115341
257	8628.5	112.5	1.2	262.295	3.6	34.8744	9.68734	3.04913	5.38	18.8679	0.954225	13.9273	3.50705	0.177365	2.58872	1.10386	0.0558264	0.81481	7.14066	5.38	39.176	0.875156	37.3025	0.877402	7.28179	0.162668	6.93354	0.163086	2.29197	0.0512006	2.18236	0.051332
266	8656.5	112.5	1.15	321.429	4.64	0.0538042	0.0125015	0.00462107	4.04	23.1861	0.466718	8.00256	5.73914	0.115524	1.98083	2.12143	0.0427027	0.7322	6.65824	5.24	13.0533	0.792168	22.2575	1.1119	2.49109	0.151177	4.24761	0.212195	0.920813	0.0558815	1.5701	0.0784363
275	8685	112.25	1.14	315.789	5.24	0.440729	0.0841085	0.0302791	5.24	45.6303	1.1265	25.1855	8.70807	0.214981	4.80639	3.13491	0.0773932	1.7303	7.46218	5.24	26.9774	0.522669	39.3401	0.928285	5.14835	0.0997459	7.50765	0.177154	1.85341	0.0359085	2.70275	0.0637753
290	8731.5	110.25	1.15	322.581	4.4	0.0930797	0.0211545	0.00784763	4.4	20.8939	0.438051	7.20041	4.7486	0.0995571	1.63646	1.76158	0.0369325	0.607072	7.38291	5.27	10.4071	0.226954	18.9071	0.565312	1.97477	0.0430653	3.58769	0.10727	0.732577	0.0159758	1.33092	0.0397936
309	8791.5	108	1.2	316.667					5.23	32.7296	0.618063	17.1156	6.25805	0.118177	3.27258	2.37806	0.0449071	1.24358	8.55954	5.23	10.1192	0.412334	17.841	0.547921	1.93483	0.0788401	3.41128	0.104765	0.735235	0.0299592	1.29629	0.0398107
333	8865	108.75	1.23	326.531	3.6	0.229617	0.0637825	0.0256171		47.027	0.576758	18.5029							7.23989	5.38	11.6272	0.455328	18.7753	1.54507	2.16119	0.0846335	3.48983	0.287189	0.868003	0.0339916	1.40163	0.115344
333	8865	108.75	1.23	326.531					5.38	44.4068	0.96958	22.0405	8.25406	0.180219	4.09674	3.3151	0.072382	1.64539	8.16887
351	8916.5	110.25	1.26	349.515	4.835	0.143036	0.035631	0.0156915	3.6	20.4124	0.458605	4.82349	5.6701	0.12739	1.33986	2.49705	0.0561012	0.590058	6.44419	4.84	18.3042	0.735605	23.6158	2.55334	3.69311	1.13354	4.88699	2.13284	1.6264	0.499199	2.15217	0.939278
369	8966.5	108.5	1.22	360	5.31	0.373828	0.0704008	0.03092	5.31	37.3369	0.481764	19.2687	7.03144	0.0907276	3.62876	3.08821	0.0398476	1.59375	7.98899	5.31	22.2296	0.116243	44.9803	1.59165	4.18637	0.0218913	8.47087	0.299745	1.83865	0.00961465	3.7204	0.131648
393	9034	107	1.19	355.556	5.16	0.116001	0.0224807	0.00951185	5.16	33.5035	0.278145	6.27831	6.49293	0.053904	1.21673	2.74723	0.0228074	0.514811	6.51875	5.23	10.3865	2.30254	25.1861	7.49258	1.98411	0.47093	4.81477	1.50917	0.839501	0.199256	2.03718	0.638546
409	9084.5	105.25	1.26	316.832					5.11	57.8107	0.611756	17.4954	11.3132	0.119717	3.42376	4.51634	0.0477922	1.36679	8.33114	5.11	8.41756	0.531098	23.3363	0.258851	1.64727	0.103933	4.56679	0.0506558	0.657604	0.0414909	1.8231	0.0202222
430	9161	105	1.25	274.51					5.33	39.9267	0.931547	21.9325	7.49093	0.174774	4.11492	2.57042	0.0599716	1.41198	6.7154	5.33	6.89116	0.387969	14.4694	0.375017	1.2929	0.0727896	2.71471	0.0703597	0.443642	0.0249768	0.931518	0.024143
451	9235.5	102	1.26	281.879					5.41	103.112	1.67295	34.0558	19.0595	0.309232	6.29498	6.76933	0.109829	2.23577	5.78675	5.41	10.6012	0.611365	18.393	1.46042	1.95956	0.113006	3.39982	0.269948	0.695973	0.0401363	1.20751	0.0958767
463	9278.5	99.5	1.24	279.07																5.3	12.5118	0.440336	21.1568	0.645448	2.36072	0.0830822	3.99186	0.121783	0.816918	0.0287503	1.38137	0.0421424
469	9300.5	99.75	1.22	276.923	3.84				2.39	13.0073	0.475001	4.01279	5.4424	0.198745	1.67899	1.83869	0.0671453	0.567241	6.46357	5.29	23.4956	1.00435	45.6543	1.61635	4.44151	0.189858	8.63031	0.305548	1.47781	0.0631708	2.87154	0.101664
484	9356	100.5	1.24	270.27					5.47	38.8267	2.21876	16.2307	7.09812	0.405624	2.96721	2.37883	0.135939	0.994417	7.47616	5.47	11.2891	0.367278	10.0471	0.676126	2.06382	0.0671441	1.83677	0.123606	0.69166	0.0225023	0.615565	0.0414248
506	9439	100	1.23	265.06	3.37	0.121802	0.0553611	0.018049	1.56	27.0684	1.74564	4.91946	17.3515	1.119	3.1535	5.65701	0.364822	1.02812	6.52158	5.18	20.118	1.04652	24.7857	0.786339	3.88378	0.20203	4.78488	0.151803	1.26621	0.0658667	1.55999	0.0494914
515	9473	106.75	1.22	264.706	5.12	0.551706	0.107755	0.0347985	5.12	43.0893	1.77522	23.3236	8.41587	0.346722	4.55539	2.86219	0.117919	1.54927	6.7378	5.12	26.8385	4.34287	44.116	1.78524	5.24189	0.848217	8.61641	0.34868	1.69282	0.273924	2.78259	0.112603
530	9529	117.5	1.25	267.857	5.09	0.456653	0.0897158	0.0300388	5.09	38.3837	1.25776	14.9851	7.54099	0.247103	2.94403	2.62772	0.0861051	1.02587	6.43087	5.09	22.5613	0.732081	44.5702	1.42784	4.43247	0.143827	8.75642	0.280518	1.48409	0.0481565	2.93184	0.0939235
554	9622.5	130.5	1.3	256.684	2.55	0.125354	0.0491583	0.0164036	2.55	25.5988	0.327308	4.89996	10.0388	0.128356	1.92155	3.3635	0.0430059	0.643819	7.32772	5.3	11.9526	0.55388	27.068	0.565283	2.25521	0.104506	5.10717	0.106657	0.752542	0.0348725	1.70421	0.0355904

## Sheet: metadata
Core name	PO362-2_33					Table S5
latitude	31.6932					column	name	unit	definition
longitude	29.7508					A	Core depth	cm	downcore depth of sample
Date/Time	2008-02-16T17:52:00					B	Age	yr BP	estimated age of the sample
elevation	-738.439					C	Error	yr	2-sigma uncertainty on age
Location	Mediterranean Sea					D	WDB	g/cm3	wet bulk density of sediments measured using a Geotek core-logger
Campaign	POS362/2	http://oceanrep.geomar.de/1351/				E	LSR	cm/ka	linear sedimentation rate computed between dated depths
Basis	Poseidon					F	Weight sedim	g	weight of sediment used for alkenones analysis
Method/Device	Gravity Corer					G	Weight C37	µg	weigh of the C37 Alkenone
						H	Conc. C37	µg/g	concentration of the C37 Alkenone
						I	MAR C37	µg/cm2.a	mass accumulation rate of the C37 Alkenone
						J	Weight sedim	g	weight of sediment used for n-alkanes analysis
						K	weight odd n-alkanes	µg	weigh of the odd n-alkanes
						L	weight lycopane	µg	weigh of the lycopane
						M	weight triterpenoids	µg	weigh of the triterpenoids
						N	conc odd n-alkanes	µg/g	concentration of the odd n-alkanes
						O	conc lycopane	µg/g	concentration of the lycopane
						P	conc triterpenoids	µg/g	concentration of the triterpenoids
						Q	MAR odd n-alkanes	µg/cm2.a	mass accumulation rate of the odd n-alkanes
						R	MAR lycopane	µg/cm2.a	mass accumulation rate of the lycopane
						S	MAR triterpenoids	µg/cm2.a	mass accumulation rate of the triterpenoids
						T	CPI		carbon preference index
						U	Weight sedim	g	weight of sediment used for GDGTs analysis
						V	Weight cren	µg	weigh of the crenarcheol
						W	sd	µg	standard deviation
						X	Weight brGDGTs	µg	weigh of the branched GDGTs
						Y	sd	µg	standard deviation
						Z	Conc cren	µg/g	concentration of the crenarcheol
						AA	sd	µg/g	standard deviation
						AB	Conc brGDGTs	µg/g	concentration of the branched GDGTs
						AC	sd	µg/g	standard deviation
						AD	MAR Cren	µg/cm2.a	mass accumulation rate of the crenarcheol
						AE	sd	µg/cm2.a	standard deviation
						AF	MAR brGDGTs	µg/cm2.a	mass accumulation rate of the branched GDGTs
						AG	sd	µg/cm2.a	standard deviation
