# Supplementary material for: Deoxygenation dynamics on the western Nile deep-sea fan during sapropel S1 from seasonal to millennial timescales
Source: Copernicus journal article supplement (doi:10.5194/cp-17-1025-2021), 2021-05-12
Supplement: Supplementary file 6 [file Suppl_Table_S6.xls]

## Sheet: Read me
Blanchet, Cécile L; Tjallingii, Rik; Schleicher, Anja; Schouten, Stefan; Frank, Martin; Brauer, Achim (2020): XRF elemental contents and biomarkers of sediment core POS362-2_99.
In supplement of
Deoxygenation dynamics on the western Nile deep-sea fan during sapropel S1 from seasonal to millenial time-scales
Blanchet et al.

## Sheet: Biomarkers_Tab S6
Core depth (cm)	Age (yr BP)	error (2s)	weight sediment (g)	WBD (g/cm3)	LSR (cm/ka)	Weight C37 (µg)	Conc. C37 (µg/g)	MAR C37 (µg/cm2.a)	weight odd n-alkanes (µg)	weight lycopane (µg)	weight triterpenoids (µg)	conc odd n-alkanes (µg/g)	conc lycopane (µg/g)	conc triterpenoids (µg/g)	MAR odd n-alkanes (µg/cm2.a)	MAR lycopane (µg/cm2.a)	MAR triterpenoids (µg/cm2.a)	CPI	Weight cren (µg)	sd	Weight brGDGTs (µg)	sd	Conc cren (µg/g)	sd	Conc brGDGTs (µg/g)	sd	MAR Cren (µg/cm2.a)	sd	MAR brGDGTs (µg/cm2.a)	sd
0	0	0	6.2	2.01	28.2486	0.149226	0.0240688	0.00136662	5.45835		0.577317	0.880379	0	0.0931157	0.0499876	0	0.00528708	7.81665	9.04933	0.289497	1.94684	0.106252	1.45957	0.0466931	0.314007	0.0171374	0.0828738	0.00265122	0.04	0
30	1062	594.5	6.3	2.14	28.2486	0.126671	0.0201065	0.00121548	3.63823		1.06562	0.577497	0	0.169146	0.0349108	0	0.0102252	7.82854	5.87338	0.0315566	4.97031	0.19271	0.932282	0.00500899	0.788938	0.0305889	0.0563583	0.000302803	0.03	0
86.5	5941	852.75	6.6	2.27	11.5802	0.876232	0.132762	0.00348995	1.68658		0.439367	0.255542	0	0.0665707	0.00502392	0	0.00130877	4.23155	1.61011	0.0904533	0.888219	0.0344689	0.236781	0.013302	0.13062	0.00506896	0.00825221	0.000463594	0.01	0
126.5	7244	277.25	6.5	2.17	30.6984	1.21292	0.186602	0.0124306	2.96172	0.0765483	1.17481	0.45565	0.0117767	0.18074	0.0277656	0.000717626	0.0110136	6.37971	14.9911	0.442944	3.60647	0.32903	2.27138	0.0671127	0.546435	0.049853	0.0570779	0.00168648	0.03	0
156.5	7390.5	269.25	6.4	1.985	204.778	0.507361	0.0792752	0.0322242	0.295333	0.0138998	0.227448	0.0461457	0.00217184	0.0355388	0.0183795	0.00086503	0.0141549	5.31206	35.4235	1.92367	16.7568	1.03929	5.44977	0.295948	2.57797	0.159891	0.332089	0.018034	0.15	0.01
188	7546	262	6.1	1.945	202.572	1.52594	0.251391	0.0990488	4.09465	0.195286	1.5741	0.674572	0.0321724	0.259324	0.2692	0.012839	0.103488	6.32188	18.4536	1.21263	10.8303	1.11982	2.88338	0.189473	1.69223	0.174972	1.14843	0.0754657	0.6	0.05
228	7739	243.5	6.2	1.97	207.254	0.678351	0.109411	0.0446716	3.32081	0.104071	1.36744	0.535614	0.0167856	0.220555	0.225347	0.00706214	0.0927931	7.96633	28.0498	1.36297	16.9741	1.13074	4.62105	0.224542	2.7964	0.186284	1.84411	0.0896075	0.94	0.05
258	7886	226.5							0.823093	0.0159928	0.248243	0.128608	0.00249887	0.0387879	0.0532806	0.00103525	0.0160693	3.19677	14.931	7.49249	19.187	9.4011	2.40823	1.20847	3.09468	1.51631	1.0132	0.508432	0.58	0.28
258	7886	226.5	6.4	2.03	204.082	0.719213	0.112377	0.0465562	0.927625	0.023957	0.261086	0.144941	0.00374328	0.0407946	0.0600471	0.00155079	0.0169006	3.36839	19.2157	1.14353	11.5981	0.626776	3.00245	0.178676	1.8122	0.0979337	1.24387	0.074023	0.66	0.05
289.5	8040	211	6.2	2.015	204.545	4.00888	0.646593	0.266499	7.59607		3.19709	1.22517	0	0.515659	0.504966	0	0.212534	7.86514	35.6119	3.27971	24.2411	2.63666	5.74386	0.528985	3.90985	0.425268	2.36738	0.218026	1.23	0.13
329.5	8235.5	188.25	6.4	2.11	204.604	2.29058	0.357904	0.154512	8.41174		4.44478	1.31433	0	0.694497	0.567416	0	0.299824	12.5899	28.8264	0.724653	25.7223	1.09979	4.50413	0.113227	4.01911	0.171843	1.94449	0.0488817	1.22	0.04
359.5	8366.5	209	6.5	2.015	229.008	0.658662	0.102118	0.0471224	7.63902		0	1.18434	0	0	0.546516	0	0		17.5723	1.01049	17.842	1.4827	2.72439	0.156666	2.7662	0.229877	1.25717	0.0722935	0.93	0.08
390	8502	227	6.5	2.04	225.092	0.772374	0.118827	0.0545638	3.68394		1.46905	0.566761	0	0.226007	0.26025	0	0.10378	8.5944	37.8099	2.0117	30.8837	1.7958	5.81691	0.309492	4.75134	0.276277	2.67106	0.142115	1.73	0.08
430	8680	250	6.4	2.04	224.719	0.596796	0.0931039	0.0426814	3.72041		1.06076	0.580408	0	0.165485	0.266074	0	0.0758627	9.40032	27.0206	0.0708972	25.3312	0.262939	4.21538	0.0110604	3.95183	0.0410201	1.93244	0.00507039	1.41	0.03
460	8813	258	6.6	2.09	225.564	0.429538	0.0654784	0.0308684	5.20378		1.14392	0.793259	0	0.174378	0.373965	0	0.0822067	9.20499	31.9323	2.21124	30.6491	2.75553	4.86774	0.33708	4.67212	0.420051	2.29479	0.158909	1.61	0.13
481	8903	265.5	6.3	0.71	233.333	0.816606	0.12962	0.0214737	3.56058		1.1309	0.565171	0	0.179508	0.09363	0	0.0297385	9.77669	33.7587	0.357659	32.8267	0.845304	5.35853	0.0567713	5.21059	0.134175	0.887729	0.00940511	0.53	0.01
501	8992	271.5	6.2	2.13	224.719	0.504773	0.081415	0.0389694	3.75404		0.998274	0.60549	0	0.161012	0.289819	0	0.0770686	6.81309	14.2233	0.693606	25.5817	1.42288	2.29408	0.111872	4.12607	0.229497	1.09806	0.0535477	0.81	0.05
528.5	9067	273	6.4	2.055	366.667	0.304112	0.0472223	0.035582	4.12419		1.10756	0.640403	0	0.171981	0.482543	0	0.129587	10.2742	27.1006	0.686756	28.1843	0.757667	4.20817	0.106639	4.37645	0.11765	3.17085	0.0803526	1.81	0.02

## Sheet: metadata
Core name	PO362-2_99			Table S6
latitude	31.9533			column	name	unit	definition
longitude	30.1597			A	Core depth	cm	downcore depth of sample
Date/Time	2008-02-22T06:26:00			B	Age	yr BP	estimated age of the sample
elevation	-396.15			C	Error	yr	2-sigma uncertainty on age
Location	Mediterranean Sea			D	Weight sedim	g	weight of sediment used for alkenones analysis
Campaign	POS362/2			E	WDB	g/cm3	wet bulk density of sediments measured using a Geotek core-logger
Basis	Poseidon			F	LSR	cm/ka	linear sedimentation rate computed between dated depths
Method/Device	Gravity Corer			G	Weight C37	µg	weigh of the C37 Alkenone
				H	Conc. C37	µg/g	concentration of the C37 Alkenone
				I	MAR C37	µg/cm2.a	mass accumulation rate of the C37 Alkenone
				J	weight odd n-alkanes	µg	weigh of the odd n-alkanes
				K	weight lycopane	µg	weigh of the lycopane
				L	weight triterpenoids	µg	weigh of the triterpenoids
				M	conc odd n-alkanes	µg/g	concentration of the odd n-alkanes
				N	conc lycopane	µg/g	concentration of the lycopane
				O	conc triterpenoids	µg/g	concentration of the triterpenoids
				P	MAR odd n-alkanes	µg/cm2.a	mass accumulation rate of the odd n-alkanes
				Q	MAR lycopane	µg/cm2.a	mass accumulation rate of the lycopane
				R	MAR triterpenoids	µg/cm2.a	mass accumulation rate of the triterpenoids
				S	CPI		carbon preference index
				T	Weight cren	µg	weigh of the crenarcheol
				U	sd	µg	standard deviation
				V	Weight brGDGTs	µg	weigh of the branched GDGTs
				W	sd	µg	standard deviation
				X	Conc cren	µg/g	concentration of the crenarcheol
				Y	sd	µg/g	standard deviation
				Z	Conc brGDGTs	µg/g	concentration of the branched GDGTs
				AA	sd	µg/g	standard deviation
				AB	MAR Cren	µg/cm2.a	mass accumulation rate of the crenarcheol
				AC	sd	µg/cm2.a	standard deviation
				AD	MAR brGDGTs	µg/cm2.a	mass accumulation rate of the branched GDGTs
				AE	sd	µg/cm2.a	standard deviation
